# Supplementary material for: Amino acid interacting network in the receptor-binding domain of SARS-CoV-2 spike protein
Source: PubMed Central journal article supplement — RSC Adv. 2020 Nov 2;10(65):39831–41. doi: 10.1039/d0ra08222h (PMC9057398; doi:10.1039/d0ra08222h), 2020-11-02
Supplement: RA-010-D0RA08222H-s001.pdf [file RA-010-D0RA08222H-s001.pdf]

### Supplementary Information for

## Amino acid interacting network in the receptor-binding domain of SARS-CoV-2 spike protein

Puja Adhikari and Wai-Yim Ching

Department of Physics and Astronomy, University of Missouri-Kansas City, Kansas City Missouri, USA

This Supplementary information consists:

**Figure S1** Distribution of 10 matrices (MT) in RBD with their AA sequence numbers.

**Table S1:** AABP matrix SD1 with BL cutoff 2.500 Å and BO cutoff 0.0100 e. Pseudo-diagonal cell are highlighted with yellow.

**Table S2:** 10 matrices of RBD showing AABP with BL cutoff 2.500 Å and BO cutoff 0.0100 e. Pseudo-diagonal cell are highlighted with yellow.

**Table S3:** Contributions to the AABP from each amino acid in RBD from the inter-amino acid interaction.

**Table S4:** Interaction among AA with BL, BO and AABP.

**Table S5:** AA with chain of *off-diagonal connections* from 9 to 3 AA.

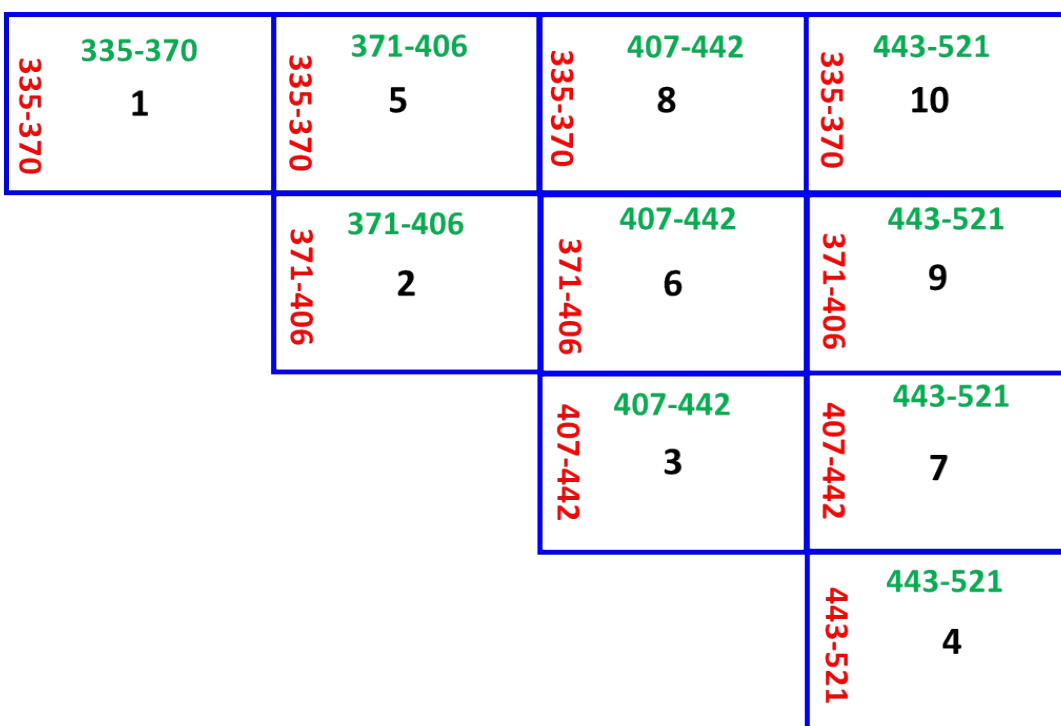

**Figure S1** Sketch showing distribution of 10 matrices (MT) of RBD with their AA sequence number. (MT1) 335-370 × 335-370, (MT2) 371-406 × 371-406, (MT3) 407-442 × 407-442, (MT4) 443-521 × 443-521, (MT5) 335-370 × 371-406, (MT6) 371-406 × 407-442, (MT7) 407-442 × 443-521, (MT8) 335-370 × 407-442, (MT9) 371-406 × 443-521, (MT10) 335-370 × 443-521.

Table S1 SD1 AABP matrix with BL cutoff 2.500 Å and BO cutoff 0.0100 e. Pseudo-diagonal cell are highlighted with yellow.

|     |     | Ser | Phe   | Thr   | Val   | Glu   | Lys   | Gly   | Ile   | Tyr   | Gln   | Thr   | Ser   | Asn   | Phe   | Arg   | Val   | Gln   | Pro   | Thr   | Glu   | Ser   | Ile   | Val   | Arg   |
|-----|-----|-----|-------|-------|-------|-------|-------|-------|-------|-------|-------|-------|-------|-------|-------|-------|-------|-------|-------|-------|-------|-------|-------|-------|-------|
|     |     | 305 | 306   | 307   | 308   | 309   | 310   | 311   | 312   | 313   | 314   | 315   | 316   | 317   | 318   | 319   | 320   | 321   | 322   | 323   | 324   | 325   | 326   | 327   | 328   |
| Ser | 305 |     | 0.399 | 0.079 |       |       |       |       |       |       |       |       |       |       |       |       |       |       |       |       |       |       |       |       |       |
| Phe | 306 |     |       | 0.432 |       |       |       |       |       |       |       |       |       |       |       |       |       |       |       |       |       |       |       |       |       |
| Thr | 307 |     |       |       | 0.496 |       |       |       |       |       |       |       |       |       |       |       |       |       |       |       |       |       |       |       |       |
| Val | 308 |     |       |       |       | 0.447 |       |       |       |       |       |       |       |       |       |       |       |       |       |       |       |       |       |       |       |
| Glu | 309 |     |       |       |       |       | 0.471 |       |       | 0.078 |       |       |       |       |       |       |       |       |       |       |       |       |       |       |       |
| Lys | 310 |     |       |       |       |       |       | 0.427 |       |       |       |       |       |       |       |       |       |       |       |       |       |       |       |       |       |
| Gly | 311 |     |       |       |       |       |       |       | 0.437 |       |       |       |       |       |       |       |       |       |       |       |       |       |       |       |       |
| Ile | 312 |     |       |       |       |       |       |       |       | 0.434 |       |       |       |       |       |       |       |       |       |       |       |       |       |       |       |
| Tyr | 313 |     |       |       |       |       |       |       |       |       | 0.422 |       |       |       |       |       |       |       |       |       |       |       |       |       |       |
| Gln | 314 |     |       |       |       |       |       |       |       |       |       | 0.403 |       |       |       |       |       |       |       |       |       |       |       |       |       |
| Thr | 315 |     |       |       |       |       |       |       |       |       |       |       | 0.472 |       |       |       |       |       |       |       |       |       |       |       |       |
| Ser | 316 |     |       |       |       |       |       |       |       |       |       |       |       | 0.485 |       |       |       |       |       |       |       |       |       |       |       |
| Asn | 317 |     |       |       |       |       |       |       |       |       |       |       |       |       | 0.466 |       |       |       |       |       |       |       |       |       |       |
| Phe | 318 |     |       |       |       |       |       |       |       |       |       |       |       |       |       | 0.444 |       |       |       |       |       |       |       |       |       |
| Arg | 319 |     |       |       |       |       |       |       |       |       |       |       |       |       |       |       | 0.431 |       |       |       |       |       |       |       |       |
| Val | 320 |     |       |       |       |       |       |       |       |       |       |       |       |       |       |       |       | 0.422 |       |       |       |       |       |       |       |
| Gln | 321 |     |       |       |       |       |       |       |       |       |       |       |       |       |       |       |       |       | 0.520 |       |       |       |       |       |       |
| Pro | 322 |     |       |       |       |       |       |       |       |       |       |       |       |       |       |       |       |       |       | 0.415 |       |       |       |       |       |
| Thr | 323 |     |       |       |       |       |       |       |       |       |       |       |       |       |       |       |       |       |       |       | 0.544 |       |       |       |       |
| Glu | 324 |     |       |       |       |       |       |       |       |       |       |       |       |       |       |       |       |       |       |       |       | 0.421 |       |       |       |
| Ser | 325 |     |       |       |       |       |       |       |       |       |       |       |       |       |       |       |       |       |       |       |       |       | 0.407 |       |       |
| Ile | 326 |     |       |       |       |       |       |       |       |       |       |       |       |       |       |       |       |       |       |       |       |       |       | 0.415 |       |
| Val | 327 |     |       |       |       |       |       |       |       |       |       |       |       |       |       |       |       |       |       |       |       |       |       |       | 0.587 |
| Arg | 328 |     |       |       |       |       |       |       |       |       |       |       |       |       |       |       |       |       |       |       |       |       |       |       |       |

**Table S2:** 10 matrices of RBD showing AABP with BL cutoff 2.500 Å and BO cutoff 0.0100 e. Pseudo-diagonal cell are highlighted with yellow.

**Matrix-1 RBD**

|         | Leu | Cys   | Pro   | Phe   | Gly   | Glu   | Val   | Phe   | Asn   | Ala   | Thr   | Arg   | Phe   | Ala   | Ser   | Val   | Tyr   | Ala   | Trp   | Asn   | Arg   | Lys   | Arg   | ILE   | Ser   | Asn   | Cys   | Val   | Ala   | Asp   | Tyr   | Ser   | Val   | Leu | Tyr   | Asn |       |  |  |
|---------|-----|-------|-------|-------|-------|-------|-------|-------|-------|-------|-------|-------|-------|-------|-------|-------|-------|-------|-------|-------|-------|-------|-------|-------|-------|-------|-------|-------|-------|-------|-------|-------|-------|-----|-------|-----|-------|--|--|
|         | 335 | 336   | 337   | 338   | 339   | 340   | 341   | 342   | 343   | 344   | 345   | 346   | 347   | 348   | 349   | 350   | 351   | 352   | 353   | 354   | 355   | 356   | 357   | 358   | 359   | 360   | 361   | 362   | 363   | 364   | 365   | 366   | 367   | 368 | 369   | 370 |       |  |  |
| Leu 335 |     | 0.417 |       |       |       |       |       |       |       |       |       |       |       |       |       |       |       |       |       |       |       |       |       |       |       |       | 0.104 |       |       |       |       |       |       |     |       |     |       |  |  |
| Cys 336 |     |       | 0.507 | 0.048 |       |       |       |       |       |       |       |       |       |       |       |       |       |       |       |       |       |       |       |       |       |       | 0.173 | 0.033 |       |       |       |       |       |     |       |     |       |  |  |
| Pro 337 |     |       |       | 0.451 |       | 0.039 |       |       |       |       |       |       |       |       |       |       |       |       |       |       |       |       |       |       |       |       |       |       |       |       |       |       |       |     |       |     |       |  |  |
| Phe 338 |     |       |       |       | 0.456 |       | 0.025 |       |       |       |       |       |       |       |       |       |       |       |       |       |       |       |       |       |       |       |       |       |       |       |       |       |       |     |       |     |       |  |  |
| Gly 339 |     |       |       |       |       | 0.434 |       |       | 0.012 |       |       |       |       |       |       |       |       |       |       |       |       |       |       |       |       |       |       |       |       |       |       |       |       |     |       |     |       |  |  |
| Glu 340 |     |       |       |       |       |       | 0.485 |       |       |       |       |       |       |       |       |       |       |       |       |       |       |       | 0.106 |       |       |       |       |       |       |       |       |       |       |     |       |     |       |  |  |
| Val 341 |     |       |       |       |       |       |       | 0.417 |       |       |       |       |       |       |       |       |       |       |       |       |       |       |       |       |       |       |       |       |       |       |       |       |       |     |       |     |       |  |  |
| Phe 342 |     |       |       |       |       |       |       |       | 0.407 |       |       |       |       |       |       |       |       |       |       |       |       |       |       |       |       |       |       |       |       |       |       |       |       |     |       |     |       |  |  |
| Asn 343 |     |       |       |       |       |       |       |       |       | 0.422 |       |       |       |       |       |       |       |       |       |       |       |       |       |       |       |       |       |       |       |       |       |       |       |     |       |     |       |  |  |
| Ala 344 |     |       |       |       |       |       |       |       |       |       | 0.423 |       |       |       |       |       |       |       |       |       |       |       |       |       |       |       |       |       |       |       |       |       |       |     |       |     |       |  |  |
| Thr 345 |     |       |       |       |       |       |       |       |       |       |       | 0.440 |       |       |       |       |       |       |       |       |       |       |       |       |       |       |       |       |       |       |       |       |       |     |       |     |       |  |  |
| Arg 346 |     |       |       |       |       |       |       |       |       |       |       |       | 0.421 |       |       |       |       |       |       |       |       |       |       |       |       |       |       |       |       |       |       |       |       |     |       |     |       |  |  |
| Phe 347 |     |       |       |       |       |       |       |       |       |       |       |       |       | 0.409 |       |       |       |       |       |       |       |       |       |       |       |       |       |       |       |       |       |       |       |     |       |     |       |  |  |
| Ala 348 |     |       |       |       |       |       |       |       |       |       |       |       |       |       | 0.425 |       |       |       |       |       |       |       |       |       |       |       |       |       |       |       |       |       |       |     |       |     |       |  |  |
| Ser 349 |     |       |       |       |       |       |       |       |       |       |       |       |       |       |       | 0.425 | 0.013 |       |       |       |       |       |       |       |       |       |       |       |       |       |       |       |       |     |       |     |       |  |  |
| Val 350 |     |       |       |       |       |       |       |       |       |       |       |       |       |       |       |       | 0.438 |       |       |       |       |       |       |       |       |       |       |       |       |       |       |       |       |     |       |     |       |  |  |
| Tyr 351 |     |       |       |       |       |       |       |       |       |       |       |       |       |       |       |       |       | 0.419 |       |       |       |       |       |       |       |       |       |       |       |       |       |       |       |     |       |     |       |  |  |
| Ala 352 |     |       |       |       |       |       |       |       |       |       |       |       |       |       |       |       |       |       | 0.421 |       |       |       |       |       |       |       |       |       |       |       |       |       |       |     |       |     |       |  |  |
| Trp 353 |     |       |       |       |       |       |       |       |       |       |       |       |       |       |       |       |       |       |       | 0.403 |       |       |       |       |       |       |       |       |       |       |       |       |       |     |       |     |       |  |  |
| Asn 354 |     |       |       |       |       |       |       |       |       |       |       |       |       |       |       |       |       |       |       |       | 0.457 |       |       |       |       |       |       |       |       |       |       |       |       |     |       |     |       |  |  |
| Arg 355 |     |       |       |       |       |       |       |       |       |       |       |       |       |       |       |       |       |       |       |       |       | 0.418 |       |       |       |       |       |       |       |       |       |       |       |     |       |     |       |  |  |
| Lys 356 |     |       |       |       |       |       |       |       |       |       |       |       |       |       |       |       |       |       |       |       |       |       | 0.442 |       |       |       |       |       |       |       |       |       |       |     |       |     |       |  |  |
| Arg 357 |     |       |       |       |       |       |       |       |       |       |       |       |       |       |       |       |       |       |       |       |       |       |       | 0.420 |       |       |       |       |       |       |       |       |       |     |       |     |       |  |  |
| ILE 358 |     |       |       |       |       |       |       |       |       |       |       |       |       |       |       |       |       |       |       |       |       |       |       |       | 0.461 |       |       |       |       |       |       |       |       |     |       |     |       |  |  |
| Ser 359 |     |       |       |       |       |       |       |       |       |       |       |       |       |       |       |       |       |       |       |       |       |       |       |       |       | 0.428 |       |       |       |       |       |       |       |     |       |     |       |  |  |
| Asn 360 |     |       |       |       |       |       |       |       |       |       |       |       |       |       |       |       |       |       |       |       |       |       |       |       |       |       | 0.425 |       |       |       |       |       |       |     |       |     |       |  |  |
| Cys 361 |     |       |       |       |       |       |       |       |       |       |       |       |       |       |       |       |       |       |       |       |       |       |       |       |       |       |       | 0.447 |       |       |       |       |       |     |       |     |       |  |  |
| Val 362 |     |       |       |       |       |       |       |       |       |       |       |       |       |       |       |       |       |       |       |       |       |       |       |       |       |       |       |       | 0.449 |       |       |       |       |     |       |     |       |  |  |
| Ala 363 |     |       |       |       |       |       |       |       |       |       |       |       |       |       |       |       |       |       |       |       |       |       |       |       |       |       |       |       |       | 0.553 | 0.047 |       |       |     |       |     |       |  |  |
| Asp 364 |     |       |       |       |       |       |       |       |       |       |       |       |       |       |       |       |       |       |       |       |       |       |       |       |       |       |       |       |       | 0.445 |       | 0.025 |       |     |       |     |       |  |  |
| Tyr 365 |     |       |       |       |       |       |       |       |       |       |       |       |       |       |       |       |       |       |       |       |       |       |       |       |       |       |       |       |       |       | 0.441 |       | 0.014 |     |       |     |       |  |  |
| Ser 366 |     |       |       |       |       |       |       |       |       |       |       |       |       |       |       |       |       |       |       |       |       |       |       |       |       |       |       |       |       |       | 0.475 |       |       |     |       |     | 0.029 |  |  |
| Val 367 |     |       |       |       |       |       |       |       |       |       |       |       |       |       |       |       |       |       |       |       |       |       |       |       |       |       |       |       |       |       |       | 0.447 |       |     |       |     |       |  |  |
| Leu 368 |     |       |       |       |       |       |       |       |       |       |       |       |       |       |       |       |       |       |       |       |       |       |       |       |       |       |       |       |       |       |       |       |       |     | 0.438 |     |       |  |  |
| Tyr 369 |     |       |       |       |       |       |       |       |       |       |       |       |       |       |       |       |       |       |       |       |       |       |       |       |       |       |       |       |       |       |       |       |       |     |       |     | 0.405 |  |  |
| Asn 370 |     |       |       |       |       |       |       |       |       |       |       |       |       |       |       |       |       |       |       |       |       |       |       |       |       |       |       |       |       |       |       |       |       |     |       |     |       |  |  |

### Matrix-2 RBD

|         | Ser | Ala   | Ser   | Phe   | Ser   | Thr   | Phe   | Lys   | Cys   | Tyr   | Gly   | Val   | Ser   | Pro   | Thr   | Lys   | Leu   | Asn   | Asp   | Leu   | Cys   | Phe   | Thr   | Asn   | Val   | Tyr   | Ala   | Asp   | Ser   | Phe   | Val   | ILE   | Arg   | Gly   | Asp | Glu   |       |       |       |  |
|---------|-----|-------|-------|-------|-------|-------|-------|-------|-------|-------|-------|-------|-------|-------|-------|-------|-------|-------|-------|-------|-------|-------|-------|-------|-------|-------|-------|-------|-------|-------|-------|-------|-------|-------|-----|-------|-------|-------|-------|--|
|         | 371 | 372   | 373   | 374   | 375   | 376   | 377   | 378   | 379   | 380   | 381   | 382   | 383   | 384   | 385   | 386   | 387   | 388   | 389   | 390   | 391   | 392   | 393   | 394   | 395   | 396   | 397   | 398   | 399   | 400   | 401   | 402   | 403   | 404   | 405 | 406   |       |       |       |  |
| Ser 371 |     | 0.431 | 0.037 |       |       |       |       |       |       |       |       |       |       |       |       |       |       |       |       |       |       |       |       |       |       |       |       |       |       |       |       |       |       |       |     |       |       |       |       |  |
| Ala 372 |     |       | 0.397 |       |       |       |       |       |       |       |       |       |       |       |       |       |       |       |       |       |       |       |       |       |       |       |       |       |       |       |       |       |       |       |     |       |       |       |       |  |
| Ser 373 |     |       |       | 0.417 |       |       |       |       |       |       |       |       |       |       |       |       |       |       |       |       |       |       |       |       |       |       |       |       |       |       |       |       |       |       |     |       |       |       |       |  |
| Phe 374 |     |       |       |       | 0.413 |       |       |       |       |       |       |       |       |       |       |       |       |       |       |       |       |       |       |       |       |       |       |       |       |       |       |       |       |       |     |       |       |       |       |  |
| Ser 375 |     |       |       |       |       | 0.401 |       |       |       |       |       |       |       |       |       |       |       |       |       |       |       |       |       |       |       |       |       |       |       |       |       |       |       |       |     |       |       |       |       |  |
| Thr 376 |     |       |       |       |       |       | 0.449 |       |       |       |       |       |       |       |       |       |       |       |       |       |       |       |       |       |       |       |       |       |       |       |       |       |       |       |     |       |       |       |       |  |
| Phe 377 |     |       |       |       |       |       |       | 0.428 |       |       |       |       |       |       |       |       |       |       |       |       |       |       |       |       |       |       |       |       |       |       |       |       |       |       |     |       |       |       |       |  |
| Lys 378 |     |       |       |       |       |       |       |       | 0.464 | 0.045 |       |       |       |       |       |       |       |       |       |       |       |       |       |       |       |       |       |       |       |       |       |       |       |       |     |       |       |       |       |  |
| Cys 379 |     |       |       |       |       |       |       |       |       | 0.428 |       |       |       |       |       |       |       |       |       |       |       |       |       |       |       |       |       |       |       |       |       |       |       |       |     |       |       |       |       |  |
| Tyr 380 |     |       |       |       |       |       |       |       |       |       | 0.431 | 0.025 |       |       |       |       |       |       |       |       |       |       |       |       |       |       |       |       |       |       |       |       |       |       |     |       |       |       |       |  |
| Gly 381 |     |       |       |       |       |       |       |       |       |       |       | 0.410 |       |       |       |       |       |       |       |       |       |       |       |       |       |       |       |       |       |       |       |       |       |       |     |       |       |       |       |  |
| Val 382 |     |       |       |       |       |       |       |       |       |       |       |       | 0.411 |       |       |       |       |       |       |       |       |       |       |       |       |       |       |       |       |       |       |       |       |       |     |       |       |       |       |  |
| Ser 383 |     |       |       |       |       |       |       |       |       |       |       |       |       | 0.510 |       | 0.019 |       |       |       |       |       |       |       |       |       |       |       |       |       |       |       |       |       |       |     |       |       |       |       |  |
| Pro 384 |     |       |       |       |       |       |       |       |       |       |       |       |       |       | 0.419 |       |       |       |       |       |       |       |       |       |       |       |       |       |       |       |       |       |       |       |     |       |       |       |       |  |
| Thr 385 |     |       |       |       |       |       |       |       |       |       |       |       |       |       |       | 0.436 |       |       |       |       |       |       |       |       |       |       |       |       |       |       |       |       |       |       |     |       |       |       |       |  |
| Lys 386 |     |       |       |       |       |       |       |       |       |       |       |       |       |       |       |       | 0.446 |       | 0.270 |       |       |       |       |       |       |       |       |       |       |       |       |       |       |       |     |       |       |       |       |  |
| Leu 387 |     |       |       |       |       |       |       |       |       |       |       |       |       |       |       |       |       | 0.419 |       |       |       |       |       |       |       |       |       |       |       |       |       |       |       |       |     |       |       |       |       |  |
| Asn 388 |     |       |       |       |       |       |       |       |       |       |       |       |       |       |       |       |       |       | 0.424 |       |       |       |       |       |       |       |       |       |       |       |       |       |       |       |     |       |       |       |       |  |
| Asp 389 |     |       |       |       |       |       |       |       |       |       |       |       |       |       |       |       |       |       |       | 0.417 |       |       |       |       |       |       |       |       |       |       |       |       |       |       |     |       |       |       |       |  |
| Leu 390 |     |       |       |       |       |       |       |       |       |       |       |       |       |       |       |       |       |       |       |       | 0.406 |       |       |       |       |       |       |       |       |       |       |       |       |       |     |       |       |       |       |  |
| Cys 391 |     |       |       |       |       |       |       |       |       |       |       |       |       |       |       |       |       |       |       |       |       | 0.411 |       |       |       |       |       |       |       |       |       |       |       |       |     |       |       |       |       |  |
| Phe 392 |     |       |       |       |       |       |       |       |       |       |       |       |       |       |       |       |       |       |       |       |       |       | 0.417 |       |       |       |       |       |       |       |       |       |       |       |     |       |       |       |       |  |
| Thr 393 |     |       |       |       |       |       |       |       |       |       |       |       |       |       |       |       |       |       |       |       |       |       |       | 0.417 |       |       |       |       |       |       |       |       |       |       |     |       |       |       |       |  |
| Asn 394 |     |       |       |       |       |       |       |       |       |       |       |       |       |       |       |       |       |       |       |       |       |       |       |       | 0.417 |       |       |       |       |       |       |       |       |       |     |       |       |       |       |  |
| Val 395 |     |       |       |       |       |       |       |       |       |       |       |       |       |       |       |       |       |       |       |       |       |       |       |       |       | 0.456 |       |       |       |       |       |       |       |       |     |       |       |       |       |  |
| Tyr 396 |     |       |       |       |       |       |       |       |       |       |       |       |       |       |       |       |       |       |       |       |       |       |       |       |       |       | 0.457 |       |       |       |       |       |       |       |     |       |       |       |       |  |
| Ala 397 |     |       |       |       |       |       |       |       |       |       |       |       |       |       |       |       |       |       |       |       |       |       |       |       |       |       |       | 0.454 |       |       |       |       |       |       |     |       |       |       |       |  |
| Asp 398 |     |       |       |       |       |       |       |       |       |       |       |       |       |       |       |       |       |       |       |       |       |       |       |       |       |       |       |       | 0.463 |       |       |       |       |       |     |       |       |       |       |  |
| Ser 399 |     |       |       |       |       |       |       |       |       |       |       |       |       |       |       |       |       |       |       |       |       |       |       |       |       |       |       |       |       | 0.471 |       |       |       |       |     |       |       |       |       |  |
| Phe 400 |     |       |       |       |       |       |       |       |       |       |       |       |       |       |       |       |       |       |       |       |       |       |       |       |       |       |       |       |       |       | 0.450 |       |       |       |     |       |       |       |       |  |
| Val 401 |     |       |       |       |       |       |       |       |       |       |       |       |       |       |       |       |       |       |       |       |       |       |       |       |       |       |       |       |       |       |       | 0.454 |       |       |     |       |       |       |       |  |
| ILE 402 |     |       |       |       |       |       |       |       |       |       |       |       |       |       |       |       |       |       |       |       |       |       |       |       |       |       |       |       |       |       |       |       | 0.422 |       |     |       |       |       |       |  |
| Arg 403 |     |       |       |       |       |       |       |       |       |       |       |       |       |       |       |       |       |       |       |       |       |       |       |       |       |       |       |       |       |       |       |       |       | 0.456 |     |       |       |       |       |  |
| Gly 404 |     |       |       |       |       |       |       |       |       |       |       |       |       |       |       |       |       |       |       |       |       |       |       |       |       |       |       |       |       |       |       |       |       |       |     | 0.458 |       |       | 0.029 |  |
| Asp 405 |     |       |       |       |       |       |       |       |       |       |       |       |       |       |       |       |       |       |       |       |       |       |       |       |       |       |       |       |       |       |       |       |       |       |     |       | 0.480 |       |       |  |
| Glu 406 |     |       |       |       |       |       |       |       |       |       |       |       |       |       |       |       |       |       |       |       |       |       |       |       |       |       |       |       |       |       |       |       |       |       |     |       |       | 0.439 |       |  |

### Matrix-3 RBD

|     | Val | Arg   | Gln   | Ile   | Ala   | Pro   | Gly   | Gln   | Thr   | Gly   | Lys   | Ile   | Ala   | Asp   | Tyr   | Asn   | Tyr   | Lys   | Leu   | Pro   | Asp   | Asp   | Phe   | Thr   | Gly   | Cys   | Val   | Ile   | Ala   | Trp   | Asn   | Ser   | Asn   | Asn   | Leu | Asp |       |       |  |
|-----|-----|-------|-------|-------|-------|-------|-------|-------|-------|-------|-------|-------|-------|-------|-------|-------|-------|-------|-------|-------|-------|-------|-------|-------|-------|-------|-------|-------|-------|-------|-------|-------|-------|-------|-----|-----|-------|-------|--|
|     | 407 | 408   | 409   | 410   | 411   | 412   | 413   | 414   | 415   | 416   | 417   | 418   | 419   | 420   | 421   | 422   | 423   | 424   | 425   | 426   | 427   | 428   | 429   | 430   | 431   | 432   | 433   | 434   | 435   | 436   | 437   | 438   | 439   | 440   | 441 | 442 |       |       |  |
| Val | 407 | 0.528 |       |       |       |       |       |       |       |       |       |       |       |       |       |       |       |       |       |       |       |       |       |       |       |       |       |       |       |       |       |       |       |       |     |     |       |       |  |
| Arg | 408 |       | 0.418 |       |       |       |       |       |       |       |       |       |       |       |       |       |       |       |       |       |       |       |       |       |       |       |       |       |       |       |       |       |       |       |     |     |       |       |  |
| Gln | 409 |       |       | 0.435 |       |       |       |       | 0.038 | 0.015 |       |       |       |       |       |       |       |       |       |       |       |       |       |       |       |       |       |       |       |       |       |       |       |       |     |     |       |       |  |
| Ile | 410 |       |       |       | 0.485 |       |       |       |       |       |       |       |       |       |       |       |       |       |       |       |       |       |       |       |       |       |       |       |       |       |       |       |       |       |     |     |       |       |  |
| Ala | 411 |       |       |       |       | 0.499 |       |       |       |       |       |       |       |       |       |       |       |       |       |       |       |       |       |       |       |       |       |       |       |       |       |       |       |       |     |     |       |       |  |
| Pro | 412 |       |       |       |       |       | 0.399 |       |       |       |       |       |       |       |       |       |       |       |       |       |       |       |       |       |       |       |       |       |       |       |       |       |       |       |     |     |       |       |  |
| Gly | 413 |       |       |       |       |       |       | 0.420 |       |       |       |       |       |       |       |       |       |       |       |       |       |       |       |       |       |       |       |       |       |       |       |       |       |       |     |     |       |       |  |
| Gln | 414 |       |       |       |       |       |       |       | 0.408 |       |       |       |       |       |       |       |       |       |       |       |       |       |       |       |       |       |       |       |       |       |       |       |       |       |     |     |       |       |  |
| Thr | 415 |       |       |       |       |       |       |       |       | 0.447 |       |       |       |       |       |       |       |       |       |       |       |       |       |       |       |       |       |       |       |       |       |       |       |       |     |     |       |       |  |
| Gly | 416 |       |       |       |       |       |       |       |       |       | 0.439 |       |       | 0.010 |       |       |       |       |       |       |       |       |       |       |       |       |       |       |       |       |       |       |       |       |     |     |       |       |  |
| Lys | 417 |       |       |       |       |       |       |       |       |       |       | 0.446 |       |       | 0.016 | 0.012 |       |       |       |       |       |       |       |       |       |       |       |       |       |       |       |       |       |       |     |     |       |       |  |
| Ile | 418 |       |       |       |       |       |       |       |       |       |       |       | 0.449 |       |       |       | 0.026 |       |       |       |       |       |       |       |       |       |       |       |       |       |       |       |       |       |     |     |       |       |  |
| Ala | 419 |       |       |       |       |       |       |       |       |       |       |       |       | 0.430 |       |       |       |       |       |       |       |       |       |       |       |       |       |       |       |       |       |       |       |       |     |     |       |       |  |
| Asp | 420 |       |       |       |       |       |       |       |       |       |       |       |       |       | 0.405 |       |       |       |       |       |       |       |       |       |       |       |       |       |       |       |       |       |       |       |     |     |       |       |  |
| Tyr | 421 |       |       |       |       |       |       |       |       |       |       |       |       |       |       | 0.417 |       |       |       |       |       |       |       |       |       |       |       |       |       |       |       |       |       |       |     |     |       |       |  |
| Asn | 422 |       |       |       |       |       |       |       |       |       |       |       |       |       |       |       | 0.441 |       |       |       |       |       |       |       |       |       |       |       |       |       |       |       |       |       |     |     |       |       |  |
| Tyr | 423 |       |       |       |       |       |       |       |       |       |       |       |       |       |       |       |       | 0.422 |       |       |       |       |       |       |       |       |       |       |       |       |       |       |       |       |     |     |       |       |  |
| Lys | 424 |       |       |       |       |       |       |       |       |       |       |       |       |       |       |       |       |       | 0.410 |       |       |       |       |       |       |       |       |       |       |       |       |       |       |       |     |     |       |       |  |
| Leu | 425 |       |       |       |       |       |       |       |       |       |       |       |       |       |       |       |       |       |       | 0.466 |       |       |       |       |       |       |       |       |       |       |       |       |       |       |     |     |       |       |  |
| Pro | 426 |       |       |       |       |       |       |       |       |       |       |       |       |       |       |       |       |       |       |       | 0.440 | 0.027 |       |       |       |       |       |       |       |       |       |       |       |       |     |     |       |       |  |
| Asp | 427 |       |       |       |       |       |       |       |       |       |       |       |       |       |       |       |       |       |       |       |       | 0.413 |       |       |       |       |       |       |       |       |       |       |       |       |     |     |       |       |  |
| Asp | 428 |       |       |       |       |       |       |       |       |       |       |       |       |       |       |       |       |       |       |       |       |       | 0.408 |       |       |       |       |       |       |       |       |       |       |       |     |     |       |       |  |
| Phe | 429 |       |       |       |       |       |       |       |       |       |       |       |       |       |       |       |       |       |       |       |       |       |       | 0.522 |       |       |       |       |       |       |       |       |       |       |     |     |       |       |  |
| Thr | 430 |       |       |       |       |       |       |       |       |       |       |       |       |       |       |       |       |       |       |       |       |       |       |       | 0.453 |       |       |       |       |       |       |       |       |       |     |     |       |       |  |
| Gly | 431 |       |       |       |       |       |       |       |       |       |       |       |       |       |       |       |       |       |       |       |       |       |       |       |       | 0.457 |       |       |       |       |       |       |       |       |     |     |       |       |  |
| Cys | 432 |       |       |       |       |       |       |       |       |       |       |       |       |       |       |       |       |       |       |       |       |       |       |       |       |       | 0.454 |       |       |       |       |       |       |       |     |     |       |       |  |
| Val | 433 |       |       |       |       |       |       |       |       |       |       |       |       |       |       |       |       |       |       |       |       |       |       |       |       |       |       | 0.443 |       |       |       |       |       |       |     |     |       |       |  |
| Ile | 434 |       |       |       |       |       |       |       |       |       |       |       |       |       |       |       |       |       |       |       |       |       |       |       |       |       |       |       | 0.469 |       |       |       |       |       |     |     |       |       |  |
| Ala | 435 |       |       |       |       |       |       |       |       |       |       |       |       |       |       |       |       |       |       |       |       |       |       |       |       |       |       |       |       | 0.483 |       |       |       |       |     |     |       |       |  |
| Trp | 436 |       |       |       |       |       |       |       |       |       |       |       |       |       |       |       |       |       |       |       |       |       |       |       |       |       |       |       |       |       | 0.464 | 0.012 |       |       |     |     |       |       |  |
| Asn | 437 |       |       |       |       |       |       |       |       |       |       |       |       |       |       |       |       |       |       |       |       |       |       |       |       |       |       |       |       |       |       | 0.404 | 0.033 |       |     |     |       |       |  |
| Ser | 438 |       |       |       |       |       |       |       |       |       |       |       |       |       |       |       |       |       |       |       |       |       |       |       |       |       |       |       |       |       |       |       | 0.467 |       |     |     | 0.018 | 0.015 |  |
| Asn | 439 |       |       |       |       |       |       |       |       |       |       |       |       |       |       |       |       |       |       |       |       |       |       |       |       |       |       |       |       |       |       |       |       | 0.472 |     |     |       |       |  |
| Asn | 440 |       |       |       |       |       |       |       |       |       |       |       |       |       |       |       |       |       |       |       |       |       |       |       |       |       |       |       |       |       |       |       |       |       |     |     | 0.422 |       |  |
| Leu | 441 |       |       |       |       |       |       |       |       |       |       |       |       |       |       |       |       |       |       |       |       |       |       |       |       |       |       |       |       |       |       |       |       |       |     |     |       | 0.403 |  |
| Asp | 442 |       |       |       |       |       |       |       |       |       |       |       |       |       |       |       |       |       |       |       |       |       |       |       |       |       |       |       |       |       |       |       |       |       |     |     |       |       |  |

### Matrix-4 RBD

|     | Ser | Tyr | Asn   | Tyr   | Leu   | Tyr   | Arg   | Pro | Leu   | Gln   | Ser   | Tyr   | Gly   | Phe   | Gln   | Pro   | Thr   | Val | Gly   | Tyr   | Gln   | Pro   | Tyr   | Arg   | Val   | Val   | Val   | Leu   | Ser   | Phe   | Glu   | Leu   | Leu   | His   | Ala | Pro |       |       |  |  |
|-----|-----|-----|-------|-------|-------|-------|-------|-----|-------|-------|-------|-------|-------|-------|-------|-------|-------|-----|-------|-------|-------|-------|-------|-------|-------|-------|-------|-------|-------|-------|-------|-------|-------|-------|-----|-----|-------|-------|--|--|
|     | 443 | 449 | 450   | 451   | 452   | 453   | 454   | 491 | 492   | 493   | 494   | 495   | 496   | 497   | 498   | 499   | 500   | 503 | 504   | 505   | 506   | 507   | 508   | 509   | 510   | 511   | 512   | 513   | 514   | 515   | 516   | 517   | 518   | 519   | 520 | 521 |       |       |  |  |
| Ser | 443 |     |       |       |       |       |       |     |       |       |       |       |       |       |       |       |       |     |       |       |       |       |       |       |       |       |       |       |       |       |       |       |       |       |     |     |       |       |  |  |
| Tyr | 449 |     | 0.506 |       |       |       |       |     |       |       | 0.071 |       |       |       |       |       |       |     |       |       |       |       |       |       |       |       |       |       |       |       |       |       |       |       |     |     |       |       |  |  |
| Asn | 450 |     |       | 0.418 |       |       |       |     |       |       |       |       |       |       |       |       |       |     |       |       |       |       |       |       |       |       |       |       |       |       |       |       |       |       |     |     |       |       |  |  |
| Tyr | 451 |     |       |       | 0.418 |       |       |     |       |       |       |       |       |       |       |       |       |     |       |       |       |       |       |       |       |       |       |       |       |       |       |       |       |       |     |     |       |       |  |  |
| Leu | 452 |     |       |       |       | 0.439 |       |     |       |       |       |       |       |       |       |       |       |     |       |       |       |       |       |       |       |       |       |       |       |       |       |       |       |       |     |     |       |       |  |  |
| Tyr | 453 |     |       |       |       |       | 0.462 |     |       |       | 0.057 |       |       |       |       |       |       |     |       |       |       |       |       |       |       |       |       |       |       |       |       |       |       |       |     |     |       |       |  |  |
| Arg | 454 |     |       |       |       |       |       |     |       |       |       |       |       |       |       |       |       |     |       |       |       |       |       |       |       |       |       |       |       |       |       |       |       |       |     |     |       |       |  |  |
| Pro | 491 |     |       |       |       |       |       |     | 0.469 |       |       |       |       |       |       |       |       |     |       |       |       |       |       |       |       |       |       |       |       |       |       |       |       |       |     |     |       |       |  |  |
| Leu | 492 |     |       |       |       |       |       |     |       | 0.416 |       |       |       |       |       |       |       |     |       |       |       |       |       |       |       |       |       |       |       |       |       |       |       |       |     |     |       |       |  |  |
| Gln | 493 |     |       |       |       |       |       |     |       |       | 0.447 |       |       |       |       |       |       |     |       |       |       |       |       |       |       |       |       |       |       |       |       |       |       |       |     |     |       |       |  |  |
| Ser | 494 |     |       |       |       |       |       |     |       |       |       | 0.417 |       |       |       |       |       |     |       |       |       |       |       |       |       |       |       |       |       |       |       |       |       |       |     |     |       |       |  |  |
| Tyr | 495 |     |       |       |       |       |       |     |       |       |       |       | 0.439 | 0.023 |       |       |       |     |       |       |       |       |       |       |       |       |       |       |       |       |       |       |       |       |     |     |       |       |  |  |
| Gly | 496 |     |       |       |       |       |       |     |       |       |       |       |       | 0.443 | 0.029 |       |       |     |       |       |       |       |       |       |       |       |       |       |       |       |       |       |       |       |     |     |       |       |  |  |
| Phe | 497 |     |       |       |       |       |       |     |       |       |       |       |       |       | 0.424 |       |       |     |       |       |       |       |       |       |       |       |       |       |       |       |       |       |       |       |     |     |       |       |  |  |
| Gln | 498 |     |       |       |       |       |       |     |       |       |       |       |       |       |       | 0.456 |       |     |       |       |       |       |       |       |       |       |       |       |       |       |       |       |       |       |     |     |       |       |  |  |
| Pro | 499 |     |       |       |       |       |       |     |       |       |       |       |       |       |       |       | 0.437 |     |       |       |       |       |       |       |       |       |       |       |       |       |       |       |       |       |     |     |       |       |  |  |
| Thr | 500 |     |       |       |       |       |       |     |       |       |       |       |       |       |       |       |       |     |       | 0.407 |       |       |       |       |       |       |       |       |       |       |       |       |       |       |     |     |       |       |  |  |
| Val | 503 |     |       |       |       |       |       |     |       |       |       |       |       |       |       |       |       |     | 0.939 |       |       |       |       | 0.109 |       |       |       |       |       |       |       |       |       |       |     |     |       |       |  |  |
| Gly | 504 |     |       |       |       |       |       |     |       |       |       |       |       |       |       |       |       |     |       |       | 0.503 |       |       |       |       |       |       |       |       |       |       |       |       |       |     |     |       |       |  |  |
| Tyr | 505 |     |       |       |       |       |       |     |       |       |       |       |       |       |       |       |       |     |       |       |       | 0.495 |       |       |       |       |       |       |       |       |       |       |       |       |     |     |       |       |  |  |
| Gln | 506 |     |       |       |       |       |       |     |       |       |       |       |       |       |       |       |       |     |       |       |       |       | 0.510 |       |       |       |       |       |       |       |       |       |       |       |     |     |       |       |  |  |
| Pro | 507 |     |       |       |       |       |       |     |       |       |       |       |       |       |       |       |       |     |       |       |       |       |       | 0.451 |       |       |       |       |       |       |       |       |       |       |     |     |       |       |  |  |
| Tyr | 508 |     |       |       |       |       |       |     |       |       |       |       |       |       |       |       |       |     |       |       |       |       |       |       | 0.438 |       |       |       |       |       |       |       |       |       |     |     |       |       |  |  |
| Arg | 509 |     |       |       |       |       |       |     |       |       |       |       |       |       |       |       |       |     |       |       |       |       |       |       |       | 0.451 |       |       |       |       |       |       |       |       |     |     |       |       |  |  |
| Val | 510 |     |       |       |       |       |       |     |       |       |       |       |       |       |       |       |       |     |       |       |       |       |       |       |       |       | 0.446 |       |       |       |       |       |       |       |     |     |       |       |  |  |
| Val | 511 |     |       |       |       |       |       |     |       |       |       |       |       |       |       |       |       |     |       |       |       |       |       |       |       |       |       | 0.453 |       |       |       |       |       |       |     |     |       |       |  |  |
| Val | 512 |     |       |       |       |       |       |     |       |       |       |       |       |       |       |       |       |     |       |       |       |       |       |       |       |       |       |       | 0.462 |       |       |       |       |       |     |     |       |       |  |  |
| Leu | 513 |     |       |       |       |       |       |     |       |       |       |       |       |       |       |       |       |     |       |       |       |       |       |       |       |       |       |       |       | 0.451 |       |       |       |       |     |     |       |       |  |  |
| Ser | 514 |     |       |       |       |       |       |     |       |       |       |       |       |       |       |       |       |     |       |       |       |       |       |       |       |       |       |       |       |       | 0.461 |       |       |       |     |     |       |       |  |  |
| Phe | 515 |     |       |       |       |       |       |     |       |       |       |       |       |       |       |       |       |     |       |       |       |       |       |       |       |       |       |       |       |       |       | 0.421 |       |       |     |     |       |       |  |  |
| Glu | 516 |     |       |       |       |       |       |     |       |       |       |       |       |       |       |       |       |     |       |       |       |       |       |       |       |       |       |       |       |       |       | 0.433 |       |       |     |     |       |       |  |  |
| Leu | 517 |     |       |       |       |       |       |     |       |       |       |       |       |       |       |       |       |     |       |       |       |       |       |       |       |       |       |       |       |       |       |       | 0.397 |       |     |     |       |       |  |  |
| Leu | 518 |     |       |       |       |       |       |     |       |       |       |       |       |       |       |       |       |     |       |       |       |       |       |       |       |       |       |       |       |       |       |       |       | 0.407 |     |     |       |       |  |  |
| His | 519 |     |       |       |       |       |       |     |       |       |       |       |       |       |       |       |       |     |       |       |       |       |       |       |       |       |       |       |       |       |       |       |       |       |     |     | 0.428 |       |  |  |
| Ala | 520 |     |       |       |       |       |       |     |       |       |       |       |       |       |       |       |       |     |       |       |       |       |       |       |       |       |       |       |       |       |       |       |       |       |     |     |       | 0.520 |  |  |
| Pro | 521 |     |       |       |       |       |       |     |       |       |       |       |       |       |       |       |       |     |       |       |       |       |       |       |       |       |       |       |       |       |       |       |       |       |     |     |       |       |  |  |

### Matrix-5 RBD

|         | Ser   | Ala | Ser | Phe | Ser | Thr | Phe | Lys | Cys | Tyr | Gly | Val | Ser | Pro | Thr | Lys | Leu | Asn | Asp | Leu | Cys | Phe | Thr | Asn | Val | Tyr | Ala | Asp | Ser | Phe | Val | Ile | Arg | Gly | Asp | Glu |  |  |  |
|---------|-------|-----|-----|-----|-----|-----|-----|-----|-----|-----|-----|-----|-----|-----|-----|-----|-----|-----|-----|-----|-----|-----|-----|-----|-----|-----|-----|-----|-----|-----|-----|-----|-----|-----|-----|-----|--|--|--|
|         | 371   | 372 | 373 | 374 | 375 | 376 | 377 | 378 | 379 | 380 | 381 | 382 | 383 | 384 | 385 | 386 | 387 | 388 | 389 | 390 | 391 | 392 | 393 | 394 | 395 | 396 | 397 | 398 | 399 | 400 | 401 | 402 | 403 | 404 | 405 | 406 |  |  |  |
| Leu 335 |       |     |     |     |     |     |     |     |     |     |     |     |     |     |     |     |     |     |     |     |     |     |     |     |     |     |     |     |     |     |     |     |     |     |     |     |  |  |  |
| Cys 336 |       |     |     |     |     |     |     |     |     |     |     |     |     |     |     |     |     |     |     |     |     |     |     |     |     |     |     |     |     |     |     |     |     |     |     |     |  |  |  |
| Pro 337 |       |     |     |     |     |     |     |     |     |     |     |     |     |     |     |     |     |     |     |     |     |     |     |     |     |     |     |     |     |     |     |     |     |     |     |     |  |  |  |
| Phe 338 |       |     |     |     |     |     |     |     |     |     |     |     |     |     |     |     |     |     |     |     |     |     |     |     |     |     |     |     |     |     |     |     |     |     |     |     |  |  |  |
| Gly 339 |       |     |     |     |     |     |     |     |     |     |     |     |     |     |     |     |     |     |     |     |     |     |     |     |     |     |     |     |     |     |     |     |     |     |     |     |  |  |  |
| Glu 340 |       |     |     |     |     |     |     |     |     |     |     |     |     |     |     |     |     |     |     |     |     |     |     |     |     |     |     |     |     |     |     |     |     |     |     |     |  |  |  |
| Val 341 |       |     |     |     |     |     |     |     |     |     |     |     |     |     |     |     |     |     |     |     |     |     |     |     |     |     |     |     |     |     |     |     |     |     |     |     |  |  |  |
| Phe 342 |       |     |     |     |     |     |     |     |     |     |     |     |     |     |     |     |     |     |     |     |     |     |     |     |     |     |     |     |     |     |     |     |     |     |     |     |  |  |  |
| Asn 343 |       |     |     |     |     |     |     |     |     |     |     |     |     |     |     |     |     |     |     |     |     |     |     |     |     |     |     |     |     |     |     |     |     |     |     |     |  |  |  |
| Ala 344 |       |     |     |     |     |     |     |     |     |     |     |     |     |     |     |     |     |     |     |     |     |     |     |     |     |     |     |     |     |     |     |     |     |     |     |     |  |  |  |
| Thr 345 |       |     |     |     |     |     |     |     |     |     |     |     |     |     |     |     |     |     |     |     |     |     |     |     |     |     |     |     |     |     |     |     |     |     |     |     |  |  |  |
| Arg 346 |       |     |     |     |     |     |     |     |     |     |     |     |     |     |     |     |     |     |     |     |     |     |     |     |     |     |     |     |     |     |     |     |     |     |     |     |  |  |  |
| Phe 347 |       |     |     |     |     |     |     |     |     |     |     |     |     |     |     |     |     |     |     |     |     |     |     |     |     |     |     |     |     |     |     |     |     |     |     |     |  |  |  |
| Ala 348 |       |     |     |     |     |     |     |     |     |     |     |     |     |     |     |     |     |     |     |     |     |     |     |     |     |     |     |     |     |     |     |     |     |     |     |     |  |  |  |
| Ser 349 |       |     |     |     |     |     |     |     |     |     |     |     |     |     |     |     |     |     |     |     |     |     |     |     |     |     |     |     |     |     |     |     |     |     |     |     |  |  |  |
| Val 350 |       |     |     |     |     |     |     |     |     |     |     |     |     |     |     |     |     |     |     |     |     |     |     |     |     |     |     |     |     |     |     |     |     |     |     |     |  |  |  |
| Tyr 351 |       |     |     |     |     |     |     |     |     |     |     |     |     |     |     |     |     |     |     |     |     |     |     |     |     |     |     |     |     |     |     |     |     |     |     |     |  |  |  |
| Ala 352 |       |     |     |     |     |     |     |     |     |     |     |     |     |     |     |     |     |     |     |     |     |     |     |     |     |     |     |     |     |     |     |     |     |     |     |     |  |  |  |
| Trp 353 |       |     |     |     |     |     |     |     |     |     |     |     |     |     |     |     |     |     |     |     |     |     |     |     |     |     |     |     |     |     |     |     |     |     |     |     |  |  |  |
| Asn 354 |       |     |     |     |     |     |     |     |     |     |     |     |     |     |     |     |     |     |     |     |     |     |     |     |     |     |     |     |     |     |     |     |     |     |     |     |  |  |  |
| Arg 355 |       |     |     |     |     |     |     |     |     |     |     |     |     |     |     |     |     |     |     |     |     |     |     |     |     |     |     |     |     |     |     |     |     |     |     |     |  |  |  |
| Lys 356 |       |     |     |     |     |     |     |     |     |     |     |     |     |     |     |     |     |     |     |     |     |     |     |     |     |     |     |     |     |     |     |     |     |     |     |     |  |  |  |
| Arg 357 |       |     |     |     |     |     |     |     |     |     |     |     |     |     |     |     |     |     |     |     |     |     |     |     |     |     |     |     |     |     |     |     |     |     |     |     |  |  |  |
| Ile 358 |       |     |     |     |     |     |     |     |     |     |     |     |     |     |     |     |     |     |     |     |     |     |     |     |     |     |     |     |     |     |     |     |     |     |     |     |  |  |  |
| Ser 359 |       |     |     |     |     |     |     |     |     |     |     |     |     |     |     |     |     |     |     |     |     |     |     |     |     |     |     |     |     |     |     |     |     |     |     |     |  |  |  |
| Asn 360 |       |     |     |     |     |     |     |     |     |     |     |     |     |     |     |     |     |     |     |     |     |     |     |     |     |     |     |     |     |     |     |     |     |     |     |     |  |  |  |
| Cys 361 |       |     |     |     |     |     |     |     |     |     |     |     |     |     |     |     |     |     |     |     |     |     |     |     |     |     |     |     |     |     |     |     |     |     |     |     |  |  |  |
| Val 362 |       |     |     |     |     |     |     |     |     |     |     |     |     |     |     |     |     |     |     |     |     |     |     |     |     |     |     |     |     |     |     |     |     |     |     |     |  |  |  |
| Ala 363 |       |     |     |     |     |     |     |     |     |     |     |     |     |     |     |     |     |     |     |     |     |     |     |     |     |     |     |     |     |     |     |     |     |     |     |     |  |  |  |
| Asp 364 |       |     |     |     |     |     |     |     |     |     |     |     |     |     |     |     |     |     |     |     |     |     |     |     |     |     |     |     |     |     |     |     |     |     |     |     |  |  |  |
| Tyr 365 |       |     |     |     |     |     |     |     |     |     |     |     |     |     |     |     |     |     |     |     |     |     |     |     |     |     |     |     |     |     |     |     |     |     |     |     |  |  |  |
| Ser 366 |       |     |     |     |     |     |     |     |     |     |     |     |     |     |     |     |     |     |     |     |     |     |     |     |     |     |     |     |     |     |     |     |     |     |     |     |  |  |  |
| Val 367 | 0.053 |     |     |     |     |     |     |     |     |     |     |     |     |     |     |     |     |     |     |     |     |     |     |     |     |     |     |     |     |     |     |     |     |     |     |     |  |  |  |
| Leu 368 |       |     |     |     |     |     |     |     |     |     |     |     |     |     |     |     |     |     |     |     |     |     |     |     |     |     |     |     |     |     |     |     |     |     |     |     |  |  |  |
| Tyr 369 |       |     |     |     |     |     |     |     |     |     |     |     |     |     |     |     |     |     |     |     |     |     |     |     |     |     |     |     |     |     |     |     |     |     |     |     |  |  |  |
| Asn 370 | 0.417 |     |     |     |     |     |     |     |     |     |     |     |     |     |     |     |     |     |     |     |     |     |     |     |     |     |     |     |     |     |     |     |     |     |     |     |  |  |  |

Matrix-6 RBD

|         | Val   | Arg   | Gln   | ILE   | Ala | Pro | Gly | Gln | Thr | Gly | Lys | ILE | Ala | Asp | Tyr | Asn | Tyr | Lys | Leu | Pro | Asp | Asp | Phe | Thr | Gly   | Cys | Val   | ILE | Ala | Trp | Asn | Ser | Asn | Asn | Leu | Asp |  |  |  |  |
|---------|-------|-------|-------|-------|-----|-----|-----|-----|-----|-----|-----|-----|-----|-----|-----|-----|-----|-----|-----|-----|-----|-----|-----|-----|-------|-----|-------|-----|-----|-----|-----|-----|-----|-----|-----|-----|--|--|--|--|
|         | 407   | 408   | 409   | 410   | 411 | 412 | 413 | 414 | 415 | 416 | 417 | 418 | 419 | 420 | 421 | 422 | 423 | 424 | 425 | 426 | 427 | 428 | 429 | 430 | 431   | 432 | 433   | 434 | 435 | 436 | 437 | 438 | 439 | 440 | 441 | 442 |  |  |  |  |
| Ser 371 |       |       |       |       |     |     |     |     |     |     |     |     |     |     |     |     |     |     |     |     |     |     |     |     |       |     |       |     |     |     |     |     |     |     |     |     |  |  |  |  |
| Ala 372 |       |       |       |       |     |     |     |     |     |     |     |     |     |     |     |     |     |     |     |     |     |     |     |     |       |     |       |     |     |     |     |     |     |     |     |     |  |  |  |  |
| Ser 373 |       |       |       |       |     |     |     |     |     |     |     |     |     |     |     |     |     |     |     |     |     |     |     |     |       |     |       |     |     |     |     |     |     |     |     |     |  |  |  |  |
| Phe 374 |       |       |       |       |     |     |     |     |     |     |     |     |     |     |     |     |     |     |     |     |     |     |     |     |       |     |       |     |     |     |     |     |     |     |     |     |  |  |  |  |
| Ser 375 |       |       |       |       |     |     |     |     |     |     |     |     |     |     |     |     |     |     |     |     |     |     |     |     |       |     |       |     |     |     |     |     |     |     |     |     |  |  |  |  |
| Thr 376 |       | 0.030 |       |       |     |     |     |     |     |     |     |     |     |     |     |     |     |     |     |     |     |     |     |     |       |     |       |     |     |     |     |     |     |     |     |     |  |  |  |  |
| Phe 377 |       |       |       |       |     |     |     |     |     |     |     |     |     |     |     |     |     |     |     |     |     |     |     |     |       |     |       |     |     |     |     |     |     |     |     |     |  |  |  |  |
| Lys 378 |       |       |       | 0.122 |     |     |     |     |     |     |     |     |     |     |     |     |     |     |     |     |     |     |     |     |       |     |       |     |     |     |     |     |     |     |     |     |  |  |  |  |
| Cys 379 |       |       |       |       |     |     |     |     |     |     |     |     |     |     |     |     |     |     |     |     |     |     |     |     |       |     | 0.043 |     |     |     |     |     |     |     |     |     |  |  |  |  |
| Tyr 380 |       |       |       |       |     |     |     |     |     |     |     |     |     |     |     |     |     |     |     |     |     |     |     |     |       |     | 0.160 |     |     |     |     |     |     |     |     |     |  |  |  |  |
| Gly 381 |       |       |       |       |     |     |     |     |     |     |     |     |     |     |     |     |     |     |     |     |     |     |     |     | 0.024 |     |       |     |     |     |     |     |     |     |     |     |  |  |  |  |
| Val 382 |       |       |       |       |     |     |     |     |     |     |     |     |     |     |     |     |     |     |     |     |     |     |     |     |       |     |       |     |     |     |     |     |     |     |     |     |  |  |  |  |
| Ser 383 |       |       |       |       |     |     |     |     |     |     |     |     |     |     |     |     |     |     |     |     |     |     |     |     |       |     |       |     |     |     |     |     |     |     |     |     |  |  |  |  |
| Pro 384 |       |       |       |       |     |     |     |     |     |     |     |     |     |     |     |     |     |     |     |     |     |     |     |     |       |     |       |     |     |     |     |     |     |     |     |     |  |  |  |  |
| Thr 385 |       |       |       |       |     |     |     |     |     |     |     |     |     |     |     |     |     |     |     |     |     |     |     |     |       |     |       |     |     |     |     |     |     |     |     |     |  |  |  |  |
| Lys 386 |       |       |       |       |     |     |     |     |     |     |     |     |     |     |     |     |     |     |     |     |     |     |     |     |       |     |       |     |     |     |     |     |     |     |     |     |  |  |  |  |
| Leu 387 |       |       |       |       |     |     |     |     |     |     |     |     |     |     |     |     |     |     |     |     |     |     |     |     |       |     |       |     |     |     |     |     |     |     |     |     |  |  |  |  |
| Asn 388 |       |       |       |       |     |     |     |     |     |     |     |     |     |     |     |     |     |     |     |     |     |     |     |     |       |     |       |     |     |     |     |     |     |     |     |     |  |  |  |  |
| Asp 389 |       |       |       |       |     |     |     |     |     |     |     |     |     |     |     |     |     |     |     |     |     |     |     |     |       |     |       |     |     |     |     |     |     |     |     |     |  |  |  |  |
| Leu 390 |       |       |       |       |     |     |     |     |     |     |     |     |     |     |     |     |     |     |     |     |     |     |     |     |       |     |       |     |     |     |     |     |     |     |     |     |  |  |  |  |
| Cys 391 |       |       |       |       |     |     |     |     |     |     |     |     |     |     |     |     |     |     |     |     |     |     |     |     |       |     |       |     |     |     |     |     |     |     |     |     |  |  |  |  |
| Phe 392 |       |       |       |       |     |     |     |     |     |     |     |     |     |     |     |     |     |     |     |     |     |     |     |     |       |     |       |     |     |     |     |     |     |     |     |     |  |  |  |  |
| Thr 393 |       |       |       |       |     |     |     |     |     |     |     |     |     |     |     |     |     |     |     |     |     |     |     |     |       |     |       |     |     |     |     |     |     |     |     |     |  |  |  |  |
| Asn 394 |       |       |       |       |     |     |     |     |     |     |     |     |     |     |     |     |     |     |     |     |     |     |     |     |       |     |       |     |     |     |     |     |     |     |     |     |  |  |  |  |
| Val 395 |       |       |       |       |     |     |     |     |     |     |     |     |     |     |     |     |     |     |     |     |     |     |     |     |       |     |       |     |     |     |     |     |     |     |     |     |  |  |  |  |
| Tyr 396 |       |       |       |       |     |     |     |     |     |     |     |     |     |     |     |     |     |     |     |     |     |     |     |     |       |     |       |     |     |     |     |     |     |     |     |     |  |  |  |  |
| Ala 397 |       |       |       |       |     |     |     |     |     |     |     |     |     |     |     |     |     |     |     |     |     |     |     |     |       |     |       |     |     |     |     |     |     |     |     |     |  |  |  |  |
| Asp 398 |       |       |       |       |     |     |     |     |     |     |     |     |     |     |     |     |     |     |     |     |     |     |     |     |       |     |       |     |     |     |     |     |     |     |     |     |  |  |  |  |
| Ser 399 |       |       |       |       |     |     |     |     |     |     |     |     |     |     |     |     |     |     |     |     |     |     |     |     |       |     |       |     |     |     |     |     |     |     |     |     |  |  |  |  |
| Phe 400 |       |       |       |       |     |     |     |     |     |     |     |     |     |     |     |     |     |     |     |     |     |     |     |     |       |     |       |     |     |     |     |     |     |     |     |     |  |  |  |  |
| Val 401 |       |       |       |       |     |     |     |     |     |     |     |     |     |     |     |     |     |     |     |     |     |     |     |     |       |     |       |     |     |     |     |     |     |     |     |     |  |  |  |  |
| ILE 402 |       |       |       |       |     |     |     |     |     |     |     |     |     |     |     |     |     |     |     |     |     |     |     |     |       |     |       |     |     |     |     |     |     |     |     |     |  |  |  |  |
| Arg 403 |       |       |       |       |     |     |     |     |     |     |     |     |     |     |     |     |     |     |     |     |     |     |     |     |       |     |       |     |     |     |     |     |     |     |     |     |  |  |  |  |
| Gly 404 | 0.045 |       |       |       |     |     |     |     |     |     |     |     |     |     |     |     |     |     |     |     |     |     |     |     |       |     |       |     |     |     |     |     |     |     |     |     |  |  |  |  |
| Asp 405 |       | 0.025 |       |       |     |     |     |     |     |     |     |     |     |     |     |     |     |     |     |     |     |     |     |     |       |     |       |     |     |     |     |     |     |     |     |     |  |  |  |  |
| Glu 406 | 0.471 |       | 0.030 |       |     |     |     |     |     |     |     |     |     |     |     |     |     |     |     |     |     |     |     |     |       |     |       |     |     |     |     |     |     |     |     |     |  |  |  |  |



Matrix-7 RBD

|         | Ser   | Tyr | Asn | Tyr | Leu   | Tyr | Arg   | Pro | Leu | Gln | Ser | Tyr | Gly | Phe | Gln | Pro   | Thr | Val | Gly | Tyr | Gln | Pro | Tyr | Arg | Val | Val | Val   | Leu | Ser | Phe | Glu | Leu | Leu | His | Ala | Pro |       |       |  |
|---------|-------|-----|-----|-----|-------|-----|-------|-----|-----|-----|-----|-----|-----|-----|-----|-------|-----|-----|-----|-----|-----|-----|-----|-----|-----|-----|-------|-----|-----|-----|-----|-----|-----|-----|-----|-----|-------|-------|--|
|         | 443   | 449 | 450 | 451 | 452   | 453 | 454   | 491 | 492 | 493 | 494 | 495 | 496 | 497 | 498 | 499   | 500 | 503 | 504 | 505 | 506 | 507 | 508 | 509 | 510 | 511 | 512   | 513 | 514 | 515 | 516 | 517 | 518 | 519 | 520 | 521 |       |       |  |
| Val 407 |       |     |     |     |       |     |       |     |     |     |     |     |     |     |     |       |     |     |     |     |     |     |     |     |     |     |       |     |     |     |     |     |     |     |     |     |       |       |  |
| Arg 408 |       |     |     |     |       |     |       |     |     |     |     |     |     |     |     |       |     |     |     |     |     |     |     |     |     |     |       |     |     |     |     |     |     |     |     |     |       |       |  |
| Gln 409 |       |     |     |     |       |     |       |     |     |     |     |     |     |     |     |       |     |     |     |     |     |     |     |     |     |     |       |     |     |     |     |     |     |     |     |     |       |       |  |
| Ile 410 |       |     |     |     |       |     |       |     |     |     |     |     |     |     |     |       |     |     |     |     |     |     |     |     |     |     |       |     |     |     |     |     |     |     |     |     |       |       |  |
| Ala 411 |       |     |     |     |       |     |       |     |     |     |     |     |     |     |     |       |     |     |     |     |     |     |     |     |     |     |       |     |     |     |     |     |     |     |     |     |       |       |  |
| Pro 412 |       |     |     |     |       |     |       |     |     |     |     |     |     |     |     |       |     |     |     |     |     |     |     |     |     |     |       |     |     |     |     |     |     |     |     |     |       |       |  |
| Gly 413 |       |     |     |     |       |     |       |     |     |     |     |     |     |     |     |       |     |     |     |     |     |     |     |     |     |     |       |     |     |     |     |     |     |     |     |     |       |       |  |
| Gln 414 |       |     |     |     |       |     |       |     |     |     |     |     |     |     |     |       |     |     |     |     |     |     |     |     |     |     |       |     |     |     |     |     |     |     |     |     |       |       |  |
| Thr 415 |       |     |     |     |       |     |       |     |     |     |     |     |     |     |     |       |     |     |     |     |     |     |     |     |     |     |       |     |     |     |     |     |     |     |     |     |       |       |  |
| Gly 416 |       |     |     |     |       |     |       |     |     |     |     |     |     |     |     |       |     |     |     |     |     |     |     |     |     |     |       |     |     |     |     |     |     |     |     |     |       |       |  |
| Lys 417 |       |     |     |     |       |     |       |     |     |     |     |     |     |     |     |       |     |     |     |     |     |     |     |     |     |     |       |     |     |     |     |     |     |     |     |     |       |       |  |
| Ile 418 |       |     |     |     |       |     |       |     |     |     |     |     |     |     |     |       |     |     |     |     |     |     |     |     |     |     |       |     |     |     |     |     |     |     |     |     |       |       |  |
| Ala 419 |       |     |     |     |       |     |       |     |     |     |     |     |     |     |     |       |     |     |     |     |     |     |     |     |     |     |       |     |     |     |     |     |     |     |     |     |       |       |  |
| Asp 420 |       |     |     |     |       |     |       |     |     |     |     |     |     |     |     |       |     |     |     |     |     |     |     |     |     |     |       |     |     |     |     |     |     |     |     |     |       |       |  |
| Tyr 421 |       |     |     |     |       |     |       |     |     |     |     |     |     |     |     |       |     |     |     |     |     |     |     |     |     |     |       |     |     |     |     |     |     |     |     |     |       |       |  |
| Asn 422 |       |     |     |     |       |     | 0.039 |     |     |     |     |     |     |     |     |       |     |     |     |     |     |     |     |     |     |     |       |     |     |     |     |     |     |     |     |     |       |       |  |
| Tyr 423 |       |     |     |     |       |     |       |     |     |     |     |     |     |     |     |       |     |     |     |     |     |     |     |     |     |     |       |     |     |     |     |     |     |     |     |     |       |       |  |
| Lys 424 |       |     |     |     |       |     |       |     |     |     |     |     |     |     |     |       |     |     |     |     |     |     |     |     |     |     |       |     |     |     |     |     |     |     |     |     |       |       |  |
| Leu 425 |       |     |     |     |       |     |       |     |     |     |     |     |     |     |     |       |     |     |     |     |     |     |     |     |     |     |       |     |     |     |     |     |     |     |     |     |       |       |  |
| Pro 426 |       |     |     |     |       |     |       |     |     |     |     |     |     |     |     |       |     |     |     |     |     |     |     |     |     |     |       |     |     |     |     |     |     |     |     |     |       |       |  |
| Asp 427 |       |     |     |     |       |     |       |     |     |     |     |     |     |     |     |       |     |     |     |     |     |     |     |     |     |     |       |     |     |     |     |     |     |     |     |     |       |       |  |
| Asp 428 |       |     |     |     |       |     |       |     |     |     |     |     |     |     |     |       |     |     |     |     |     |     |     |     |     |     |       |     |     |     |     |     |     |     |     |     |       |       |  |
| Phe 429 |       |     |     |     |       |     |       |     |     |     |     |     |     |     |     |       |     |     |     |     |     |     |     |     |     |     |       |     |     |     |     |     |     |     |     |     |       |       |  |
| Thr 430 |       |     |     |     |       |     |       |     |     |     |     |     |     |     |     |       |     |     |     |     |     |     |     |     |     |     |       |     |     |     |     |     |     |     |     |     |       |       |  |
| Gly 431 |       |     |     |     |       |     |       |     |     |     |     |     |     |     |     |       |     |     |     |     |     |     |     |     |     |     |       |     |     |     |     |     |     |     |     |     |       | 0.022 |  |
| Cys 432 |       |     |     |     |       |     |       |     |     |     |     |     |     |     |     |       |     |     |     |     |     |     |     |     |     |     |       |     |     |     |     |     |     |     |     |     | 0.028 |       |  |
| Val 433 |       |     |     |     |       |     |       |     |     |     |     |     |     |     |     |       |     |     |     |     |     |     |     |     |     |     |       |     |     |     |     |     |     |     |     |     |       |       |  |
| Ile 434 |       |     |     |     |       |     |       |     |     |     |     |     |     |     |     |       |     |     |     |     |     |     |     |     |     |     | 0.066 |     |     |     |     |     |     |     |     |     |       |       |  |
| Ala 435 |       |     |     |     |       |     |       |     |     |     |     |     |     |     |     |       |     |     |     |     |     |     |     |     |     |     |       |     |     |     |     |     |     |     |     |     |       |       |  |
| Trp 436 |       |     |     |     |       |     |       |     |     |     |     |     |     |     |     |       |     |     |     |     |     |     |     |     |     |     |       |     |     |     |     |     |     |     |     |     |       |       |  |
| Asn 437 |       |     |     |     |       |     |       |     |     |     |     |     |     |     |     |       |     |     |     |     |     |     |     |     |     |     |       |     |     |     |     |     |     |     |     |     |       |       |  |
| Ser 438 |       |     |     |     |       |     |       |     |     |     |     |     |     |     |     |       |     |     |     |     |     |     |     |     |     |     |       |     |     |     |     |     |     |     |     |     |       |       |  |
| Asn 439 | 0.065 |     |     |     |       |     |       |     |     |     |     |     |     |     |     | 0.031 |     |     |     |     |     |     |     |     |     |     |       |     |     |     |     |     |     |     |     |     |       |       |  |
| Asn 440 |       |     |     |     |       |     |       |     |     |     |     |     |     |     |     |       |     |     |     |     |     |     |     |     |     |     |       |     |     |     |     |     |     |     |     |     |       |       |  |
| Leu 441 |       |     |     |     |       |     |       |     |     |     |     |     |     |     |     |       |     |     |     |     |     |     |     |     |     |     |       |     |     |     |     |     |     |     |     |     |       |       |  |
| Asp 442 | 0.408 |     |     |     | 0.058 |     |       |     |     |     |     |     |     |     |     |       |     |     |     |     |     |     |     |     |     |     |       |     |     |     |     |     |     |     |     |     |       |       |  |
|         |       |     |     |     |       |     |       |     |     |     |     |     |     |     |     |       |     |     |     |     |     |     |     |     |     |     |       |     |     |     |     |     |     |     |     |     |       |       |  |

### Matrix-8 RBD

|         | Val | Arg | Gln | Ile | Ala | Pro | Gly | Gln | Thr | Gly | Lys | Ile | Ala | Asp | Tyr | Asn   | Tyr   | Lys | Leu | Pro | Asp | Asp | Phe | Thr | Gly | Cys | Val | Ile | Ala | Trp | Asn | Ser | Asn | Asn | Leu | Asp |  |  |  |
|---------|-----|-----|-----|-----|-----|-----|-----|-----|-----|-----|-----|-----|-----|-----|-----|-------|-------|-----|-----|-----|-----|-----|-----|-----|-----|-----|-----|-----|-----|-----|-----|-----|-----|-----|-----|-----|--|--|--|
|         | 407 | 408 | 409 | 410 | 411 | 412 | 413 | 414 | 415 | 416 | 417 | 418 | 419 | 420 | 421 | 422   | 423   | 424 | 425 | 426 | 427 | 428 | 429 | 430 | 431 | 432 | 433 | 434 | 435 | 436 | 437 | 438 | 439 | 440 | 441 | 442 |  |  |  |
| Leu 335 |     |     |     |     |     |     |     |     |     |     |     |     |     |     |     |       |       |     |     |     |     |     |     |     |     |     |     |     |     |     |     |     |     |     |     |     |  |  |  |
| Cys 336 |     |     |     |     |     |     |     |     |     |     |     |     |     |     |     |       |       |     |     |     |     |     |     |     |     |     |     |     |     |     |     |     |     |     |     |     |  |  |  |
| Pro 337 |     |     |     |     |     |     |     |     |     |     |     |     |     |     |     |       |       |     |     |     |     |     |     |     |     |     |     |     |     |     |     |     |     |     |     |     |  |  |  |
| Phe 338 |     |     |     |     |     |     |     |     |     |     |     |     |     |     |     |       |       |     |     |     |     |     |     |     |     |     |     |     |     |     |     |     |     |     |     |     |  |  |  |
| Gly 339 |     |     |     |     |     |     |     |     |     |     |     |     |     |     |     |       |       |     |     |     |     |     |     |     |     |     |     |     |     |     |     |     |     |     |     |     |  |  |  |
| Glu 340 |     |     |     |     |     |     |     |     |     |     |     |     |     |     |     |       |       |     |     |     |     |     |     |     |     |     |     |     |     |     |     |     |     |     |     |     |  |  |  |
| Val 341 |     |     |     |     |     |     |     |     |     |     |     |     |     |     |     |       |       |     |     |     |     |     |     |     |     |     |     |     |     |     |     |     |     |     |     |     |  |  |  |
| Phe 342 |     |     |     |     |     |     |     |     |     |     |     |     |     |     |     |       |       |     |     |     |     |     |     |     |     |     |     |     |     |     |     |     |     |     |     |     |  |  |  |
| Asn 343 |     |     |     |     |     |     |     |     |     |     |     |     |     |     |     |       |       |     |     |     |     |     |     |     |     |     |     |     |     |     |     |     |     |     |     |     |  |  |  |
| Ala 344 |     |     |     |     |     |     |     |     |     |     |     |     |     |     |     |       |       |     |     |     |     |     |     |     |     |     |     |     |     |     |     |     |     |     |     |     |  |  |  |
| Thr 345 |     |     |     |     |     |     |     |     |     |     |     |     |     |     |     |       |       |     |     |     |     |     |     |     |     |     |     |     |     |     |     |     |     |     |     |     |  |  |  |
| Arg 346 |     |     |     |     |     |     |     |     |     |     |     |     |     |     |     |       |       |     |     |     |     |     |     |     |     |     |     |     |     |     |     |     |     |     |     |     |  |  |  |
| Phe 347 |     |     |     |     |     |     |     |     |     |     |     |     |     |     |     |       |       |     |     |     |     |     |     |     |     |     |     |     |     |     |     |     |     |     |     |     |  |  |  |
| Ala 348 |     |     |     |     |     |     |     |     |     |     |     |     |     |     |     |       |       |     |     |     |     |     |     |     |     |     |     |     |     |     |     |     |     |     |     |     |  |  |  |
| Ser 349 |     |     |     |     |     |     |     |     |     |     |     |     |     |     |     |       |       |     |     |     |     |     |     |     |     |     |     |     |     |     |     |     |     |     |     |     |  |  |  |
| Val 350 |     |     |     |     |     |     |     |     |     |     |     |     |     |     |     |       |       |     |     |     |     |     |     |     |     |     |     |     |     |     |     |     |     |     |     |     |  |  |  |
| Tyr 351 |     |     |     |     |     |     |     |     |     |     |     |     |     |     |     |       |       |     |     |     |     |     |     |     |     |     |     |     |     |     |     |     |     |     |     |     |  |  |  |
| Ala 352 |     |     |     |     |     |     |     |     |     |     |     |     |     |     |     |       |       |     |     |     |     |     |     |     |     |     |     |     |     |     |     |     |     |     |     |     |  |  |  |
| Trp 353 |     |     |     |     |     |     |     |     |     |     |     |     |     |     |     | 0.025 |       |     |     |     |     |     |     |     |     |     |     |     |     |     |     |     |     |     |     |     |  |  |  |
| Asn 354 |     |     |     |     |     |     |     |     |     |     |     |     |     |     |     |       |       |     |     |     |     |     |     |     |     |     |     |     |     |     |     |     |     |     |     |     |  |  |  |
| Arg 355 |     |     |     |     |     |     |     |     |     |     |     |     |     |     |     |       | 0.019 |     |     |     |     |     |     |     |     |     |     |     |     |     |     |     |     |     |     |     |  |  |  |
| Lys 356 |     |     |     |     |     |     |     |     |     |     |     |     |     |     |     |       |       |     |     |     |     |     |     |     |     |     |     |     |     |     |     |     |     |     |     |     |  |  |  |
| Arg 357 |     |     |     |     |     |     |     |     |     |     |     |     |     |     |     |       |       |     |     |     |     |     |     |     |     |     |     |     |     |     |     |     |     |     |     |     |  |  |  |
| Ile 358 |     |     |     |     |     |     |     |     |     |     |     |     |     |     |     |       |       |     |     |     |     |     |     |     |     |     |     |     |     |     |     |     |     |     |     |     |  |  |  |
| Ser 359 |     |     |     |     |     |     |     |     |     |     |     |     |     |     |     |       |       |     |     |     |     |     |     |     |     |     |     |     |     |     |     |     |     |     |     |     |  |  |  |
| Asn 360 |     |     |     |     |     |     |     |     |     |     |     |     |     |     |     |       |       |     |     |     |     |     |     |     |     |     |     |     |     |     |     |     |     |     |     |     |  |  |  |
| Cys 361 |     |     |     |     |     |     |     |     |     |     |     |     |     |     |     |       |       |     |     |     |     |     |     |     |     |     |     |     |     |     |     |     |     |     |     |     |  |  |  |
| Val 362 |     |     |     |     |     |     |     |     |     |     |     |     |     |     |     |       |       |     |     |     |     |     |     |     |     |     |     |     |     |     |     |     |     |     |     |     |  |  |  |
| Ala 363 |     |     |     |     |     |     |     |     |     |     |     |     |     |     |     |       |       |     |     |     |     |     |     |     |     |     |     |     |     |     |     |     |     |     |     |     |  |  |  |
| Asp 364 |     |     |     |     |     |     |     |     |     |     |     |     |     |     |     |       |       |     |     |     |     |     |     |     |     |     |     |     |     |     |     |     |     |     |     |     |  |  |  |
| Tyr 365 |     |     |     |     |     |     |     |     |     |     |     |     |     |     |     |       |       |     |     |     |     |     |     |     |     |     |     |     |     |     |     |     |     |     |     |     |  |  |  |
| Ser 366 |     |     |     |     |     |     |     |     |     |     |     |     |     |     |     |       |       |     |     |     |     |     |     |     |     |     |     |     |     |     |     |     |     |     |     |     |  |  |  |
| Val 367 |     |     |     |     |     |     |     |     |     |     |     |     |     |     |     |       |       |     |     |     |     |     |     |     |     |     |     |     |     |     |     |     |     |     |     |     |  |  |  |
| Leu 368 |     |     |     |     |     |     |     |     |     |     |     |     |     |     |     |       |       |     |     |     |     |     |     |     |     |     |     |     |     |     |     |     |     |     |     |     |  |  |  |
| Tyr 369 |     |     |     |     |     |     |     |     |     |     |     |     |     |     |     |       |       |     |     |     |     |     |     |     |     |     |     |     |     |     |     |     |     |     |     |     |  |  |  |
| Asn 370 |     |     |     |     |     |     |     |     |     |     |     |     |     |     |     |       |       |     |     |     |     |     |     |     |     |     |     |     |     |     |     |     |     |     |     |     |  |  |  |

Matrix-9 RBD

|         | Ser | Tyr | Asn | Tyr | Leu | Tyr | Arg | Pro | Leu | Gln | Ser | Tyr | Gly | Phe | Gln | Pro | Thr | Val | Gly | Tyr | Gln | Pro | Tyr | Arg | Val | Val | Val | Leu | Ser | Phe | Glu | Leu | Leu | His | Ala | Pro |  |       |  |
|---------|-----|-----|-----|-----|-----|-----|-----|-----|-----|-----|-----|-----|-----|-----|-----|-----|-----|-----|-----|-----|-----|-----|-----|-----|-----|-----|-----|-----|-----|-----|-----|-----|-----|-----|-----|-----|--|-------|--|
|         | 443 | 449 | 450 | 451 | 452 | 453 | 454 | 491 | 492 | 493 | 494 | 495 | 496 | 497 | 498 | 499 | 500 | 503 | 504 | 505 | 506 | 507 | 508 | 509 | 510 | 511 | 512 | 513 | 514 | 515 | 516 | 517 | 518 | 519 | 520 | 521 |  |       |  |
| Ser 371 |     |     |     |     |     |     |     |     |     |     |     |     |     |     |     |     |     |     |     |     |     |     |     |     |     |     |     |     |     |     |     |     |     |     |     |     |  |       |  |
| Ala 372 |     |     |     |     |     |     |     |     |     |     |     |     |     |     |     |     |     |     |     |     |     |     |     |     |     |     |     |     |     |     |     |     |     |     |     |     |  |       |  |
| Ser 373 |     |     |     |     |     |     |     |     |     |     |     |     |     |     |     |     |     |     |     |     |     |     |     |     |     |     |     |     |     |     |     |     |     |     |     |     |  |       |  |
| Phe 374 |     |     |     |     |     |     |     |     |     |     |     |     |     |     |     |     |     |     |     |     |     |     |     |     |     |     |     |     |     |     |     |     |     |     |     |     |  |       |  |
| Ser 375 |     |     |     |     |     |     |     |     |     |     |     |     |     |     |     |     |     |     |     |     |     |     |     |     |     |     |     |     |     |     |     |     |     |     |     |     |  |       |  |
| Thr 376 |     |     |     |     |     |     |     |     |     |     |     |     |     |     |     |     |     |     |     |     |     |     |     |     |     |     |     |     |     |     |     |     |     |     |     |     |  |       |  |
| Phe 377 |     |     |     |     |     |     |     |     |     |     |     |     |     |     |     |     |     |     |     |     |     |     |     |     |     |     |     |     |     |     |     |     |     |     |     |     |  |       |  |
| Lys 378 |     |     |     |     |     |     |     |     |     |     |     |     |     |     |     |     |     |     |     |     |     |     |     |     |     |     |     |     |     |     |     |     |     |     |     |     |  |       |  |
| Cys 379 |     |     |     |     |     |     |     |     |     |     |     |     |     |     |     |     |     |     |     |     |     |     |     |     |     |     |     |     |     |     |     |     |     |     |     |     |  |       |  |
| Tyr 380 |     |     |     |     |     |     |     |     |     |     |     |     |     |     |     |     |     |     |     |     |     |     |     |     |     |     |     |     |     |     |     |     |     |     |     |     |  |       |  |
| Gly 381 |     |     |     |     |     |     |     |     |     |     |     |     |     |     |     |     |     |     |     |     |     |     |     |     |     |     |     |     |     |     |     |     |     |     |     |     |  |       |  |
| Val 382 |     |     |     |     |     |     |     |     |     |     |     |     |     |     |     |     |     |     |     |     |     |     |     |     |     |     |     |     |     |     |     |     |     |     |     |     |  |       |  |
| Ser 383 |     |     |     |     |     |     |     |     |     |     |     |     |     |     |     |     |     |     |     |     |     |     |     |     |     |     |     |     |     |     |     |     |     |     |     |     |  |       |  |
| Pro 384 |     |     |     |     |     |     |     |     |     |     |     |     |     |     |     |     |     |     |     |     |     |     |     |     |     |     |     |     |     |     |     |     |     |     |     |     |  |       |  |
| Thr 385 |     |     |     |     |     |     |     |     |     |     |     |     |     |     |     |     |     |     |     |     |     |     |     |     |     |     |     |     |     |     |     |     |     |     |     |     |  |       |  |
| Lys 386 |     |     |     |     |     |     |     |     |     |     |     |     |     |     |     |     |     |     |     |     |     |     |     |     |     |     |     |     |     |     |     |     |     |     |     |     |  |       |  |
| Leu 387 |     |     |     |     |     |     |     |     |     |     |     |     |     |     |     |     |     |     |     |     |     |     |     |     |     |     |     |     |     |     |     |     |     |     |     |     |  |       |  |
| Asn 388 |     |     |     |     |     |     |     |     |     |     |     |     |     |     |     |     |     |     |     |     |     |     |     |     |     |     |     |     |     |     |     |     |     |     |     |     |  |       |  |
| Asp 389 |     |     |     |     |     |     |     |     |     |     |     |     |     |     |     |     |     |     |     |     |     |     |     |     |     |     |     |     |     |     |     |     |     |     |     |     |  |       |  |
| Leu 390 |     |     |     |     |     |     |     |     |     |     |     |     |     |     |     |     |     |     |     |     |     |     |     |     |     |     |     |     |     |     |     |     |     |     |     |     |  |       |  |
| Cys 391 |     |     |     |     |     |     |     |     |     |     |     |     |     |     |     |     |     |     |     |     |     |     |     |     |     |     |     |     |     |     |     |     |     |     |     |     |  |       |  |
| Phe 392 |     |     |     |     |     |     |     |     |     |     |     |     |     |     |     |     |     |     |     |     |     |     |     |     |     |     |     |     |     |     |     |     |     |     |     |     |  |       |  |
| Thr 393 |     |     |     |     |     |     |     |     |     |     |     |     |     |     |     |     |     |     |     |     |     |     |     |     |     |     |     |     |     |     |     |     |     |     |     |     |  | 0.043 |  |
| Asn 394 |     |     |     |     |     |     |     |     |     |     |     |     |     |     |     |     |     |     |     |     |     |     |     |     |     |     |     |     |     |     |     |     |     |     |     |     |  | 0.043 |  |
| Val 395 |     |     |     |     |     |     |     |     |     |     |     |     |     |     |     |     |     |     |     |     |     |     |     |     |     |     |     |     |     |     |     |     |     |     |     |     |  |       |  |
| Tyr 396 |     |     |     |     |     |     |     |     |     |     |     |     |     |     |     |     |     |     |     |     |     |     |     |     |     |     |     |     |     |     |     |     |     |     |     |     |  |       |  |
| Ala 397 |     |     |     |     |     |     |     |     |     |     |     |     |     |     |     |     |     |     |     |     |     |     |     |     |     |     |     |     |     |     |     |     |     |     |     |     |  |       |  |
| Asp 398 |     |     |     |     |     |     |     |     |     |     |     |     |     |     |     |     |     |     |     |     |     |     |     |     |     |     |     |     |     |     |     |     |     |     |     |     |  |       |  |
| Ser 399 |     |     |     |     |     |     |     |     |     |     |     |     |     |     |     |     |     |     |     |     |     |     |     |     |     |     |     |     |     |     |     |     |     |     |     |     |  |       |  |
| Phe 400 |     |     |     |     |     |     |     |     |     |     |     |     |     |     |     |     |     |     |     |     |     |     |     |     |     |     |     |     |     |     |     |     |     |     |     |     |  |       |  |
| Val 401 |     |     |     |     |     |     |     |     |     |     |     |     |     |     |     |     |     |     |     |     |     |     |     |     |     |     |     |     |     |     |     |     |     |     |     |     |  |       |  |
| Ile 402 |     |     |     |     |     |     |     |     |     |     |     |     |     |     |     |     |     |     |     |     |     |     |     |     |     |     |     |     |     |     |     |     |     |     |     |     |  |       |  |
| Arg 403 |     |     |     |     |     |     |     |     |     |     |     |     |     |     |     |     |     |     |     |     |     |     |     |     |     |     |     |     |     |     |     |     |     |     |     |     |  |       |  |
| Gly 404 |     |     |     |     |     |     |     |     |     |     |     |     |     |     |     |     |     |     |     |     |     |     |     |     |     |     |     |     |     |     |     |     |     |     |     |     |  |       |  |
| Asp 405 |     |     |     |     |     |     |     |     |     |     |     |     |     |     |     |     |     |     |     |     |     |     |     |     |     |     |     |     |     |     |     |     |     |     |     |     |  |       |  |
| Glu 406 |     |     |     |     |     |     |     |     |     |     |     |     |     |     |     |     |     |     |     |     |     |     |     |     |     |     |     |     |     |     |     |     |     |     |     |     |  |       |  |

Matrix-10 RBD

|     | Ser | Tyr | Asn | Tyr | Leu | Tyr | Arg | Pro | Leu | Gln | Ser | Tyr | Gly | Phe | Gln | Pro | Thr | Val | Gly | Tyr | Gln | Pro | Tyr | Arg | Val | Val | Val | Leu | Ser | Phe | Glu | Leu | Leu | His | Ala | Pro |  |  |
|-----|-----|-----|-----|-----|-----|-----|-----|-----|-----|-----|-----|-----|-----|-----|-----|-----|-----|-----|-----|-----|-----|-----|-----|-----|-----|-----|-----|-----|-----|-----|-----|-----|-----|-----|-----|-----|--|--|
|     | 443 | 449 | 450 | 451 | 452 | 453 | 454 | 491 | 492 | 493 | 494 | 495 | 496 | 497 | 498 | 499 | 500 | 503 | 504 | 505 | 506 | 507 | 508 | 509 | 510 | 511 | 512 | 513 | 514 | 515 | 516 | 517 | 518 | 519 | 520 | 521 |  |  |
| Leu | 335 |     |     |     |     |     |     |     |     |     |     |     |     |     |     |     |     |     |     |     |     |     |     |     |     |     |     |     |     |     |     |     |     |     |     |     |  |  |
| Cys | 336 |     |     |     |     |     |     |     |     |     |     |     |     |     |     |     |     |     |     |     |     |     |     |     |     |     |     |     |     |     |     |     |     |     |     |     |  |  |
| Pro | 337 |     |     |     |     |     |     |     |     |     |     |     |     |     |     |     |     |     |     |     |     |     |     |     |     |     |     |     |     |     |     |     |     |     |     |     |  |  |
| Phe | 338 |     |     |     |     |     |     |     |     |     |     |     |     |     |     |     |     |     |     |     |     |     |     |     |     |     |     |     |     |     |     |     |     |     |     |     |  |  |
| Gly | 339 |     |     |     |     |     |     |     |     |     |     |     |     |     |     |     |     |     |     |     |     |     |     |     |     |     |     |     |     |     |     |     |     |     |     |     |  |  |
| Glu | 340 |     |     |     |     |     |     |     |     |     |     |     |     |     |     |     |     |     |     |     |     |     |     |     |     |     |     |     |     |     |     |     |     |     |     |     |  |  |
| Val | 341 |     |     |     |     |     |     |     |     |     |     |     |     |     |     |     |     |     |     |     |     |     |     |     |     |     |     |     |     |     |     |     |     |     |     |     |  |  |
| Phe | 342 |     |     |     |     |     |     |     |     |     |     |     |     |     |     |     |     |     |     |     |     |     |     |     |     |     |     |     |     |     |     |     |     |     |     |     |  |  |
| Asn | 343 |     |     |     |     |     |     |     |     |     |     |     |     |     |     |     |     |     |     |     |     |     |     |     |     |     |     |     |     |     |     |     |     |     |     |     |  |  |
| Ala | 344 |     |     |     |     |     |     |     |     |     |     |     |     |     |     |     |     |     |     |     |     |     |     |     |     |     |     |     |     |     |     |     |     |     |     |     |  |  |
| Thr | 345 |     |     |     |     |     |     |     |     |     |     |     |     |     |     |     |     |     |     |     |     |     |     |     |     |     |     |     |     |     |     |     |     |     |     |     |  |  |
| Arg | 346 |     |     |     |     |     |     |     |     |     |     |     |     |     |     |     |     |     |     |     |     |     |     |     |     |     |     |     |     |     |     |     |     |     |     |     |  |  |
| Phe | 347 |     |     |     |     |     |     |     |     |     |     |     |     |     |     |     |     |     |     |     |     |     |     |     |     |     |     |     |     |     |     |     |     |     |     |     |  |  |
| Ala | 348 |     |     |     |     |     |     |     |     |     |     |     |     |     |     |     |     |     |     |     |     |     |     |     |     |     |     |     |     |     |     |     |     |     |     |     |  |  |
| Ser | 349 |     |     |     |     |     |     |     |     |     |     |     |     |     |     |     |     |     |     |     |     |     |     |     |     |     |     |     |     |     |     |     |     |     |     |     |  |  |
| Val | 350 |     |     |     |     |     |     |     |     |     |     |     |     |     |     |     |     |     |     |     |     |     |     |     |     |     |     |     |     |     |     |     |     |     |     |     |  |  |
| Tyr | 351 |     |     |     |     |     |     |     |     |     |     |     |     |     |     |     |     |     |     |     |     |     |     |     |     |     |     |     |     |     |     |     |     |     |     |     |  |  |
| Ala | 352 |     |     |     |     |     |     |     |     |     |     |     |     |     |     |     |     |     |     |     |     |     |     |     |     |     |     |     |     |     |     |     |     |     |     |     |  |  |
| Trp | 353 |     |     |     |     |     |     |     |     |     |     |     |     |     |     |     |     |     |     |     |     |     |     |     |     |     |     |     |     |     |     |     |     |     |     |     |  |  |
| Asn | 354 |     |     |     |     |     |     |     |     |     |     |     |     |     |     |     |     |     |     |     |     |     |     |     |     |     |     |     |     |     |     |     |     |     |     |     |  |  |
| Arg | 355 |     |     |     |     |     |     |     |     |     |     |     |     |     |     |     |     |     |     |     |     |     |     |     |     |     |     |     |     |     |     |     |     |     |     |     |  |  |
| Lys | 356 |     |     |     |     |     |     |     |     |     |     |     |     |     |     |     |     |     |     |     |     |     |     |     |     |     |     |     |     |     |     |     |     |     |     |     |  |  |
| Arg | 357 |     |     |     |     |     |     |     |     |     |     |     |     |     |     |     |     |     |     |     |     |     |     |     |     |     |     |     |     |     |     |     |     |     |     |     |  |  |
| Ile | 358 |     |     |     |     |     |     |     |     |     |     |     |     |     |     |     |     |     |     |     |     |     |     |     |     |     |     |     |     |     |     |     |     |     |     |     |  |  |
| Ser | 359 |     |     |     |     |     |     |     |     |     |     |     |     |     |     |     |     |     |     |     |     |     |     |     |     |     |     |     |     |     |     |     |     |     |     |     |  |  |
| Asn | 360 |     |     |     |     |     |     |     |     |     |     |     |     |     |     |     |     |     |     |     |     |     |     |     |     |     |     |     |     |     |     |     |     |     |     |     |  |  |
| Cys | 361 |     |     |     |     |     |     |     |     |     |     |     |     |     |     |     |     |     |     |     |     |     |     |     |     |     |     |     |     |     |     |     |     |     |     |     |  |  |
| Val | 362 |     |     |     |     |     |     |     |     |     |     |     |     |     |     |     |     |     |     |     |     |     |     |     |     |     |     |     |     |     |     |     |     |     |     |     |  |  |
| Ala | 363 |     |     |     |     |     |     |     |     |     |     |     |     |     |     |     |     |     |     |     |     |     |     |     |     |     |     |     |     |     |     |     |     |     |     |     |  |  |
| Asp | 364 |     |     |     |     |     |     |     |     |     |     |     |     |     |     |     |     |     |     |     |     |     |     |     |     |     |     |     |     |     |     |     |     |     |     |     |  |  |
| Tyr | 365 |     |     |     |     |     |     |     |     |     |     |     |     |     |     |     |     |     |     |     |     |     |     |     |     |     |     |     |     |     |     |     |     |     |     |     |  |  |
| Ser | 366 |     |     |     |     |     |     |     |     |     |     |     |     |     |     |     |     |     |     |     |     |     |     |     |     |     |     |     |     |     |     |     |     |     |     |     |  |  |
| Val | 367 |     |     |     |     |     |     |     |     |     |     |     |     |     |     |     |     |     |     |     |     |     |     |     |     |     |     |     |     |     |     |     |     |     |     |     |  |  |
| Leu | 368 |     |     |     |     |     |     |     |     |     |     |     |     |     |     |     |     |     |     |     |     |     |     |     |     |     |     |     |     |     |     |     |     |     |     |     |  |  |
| Tyr | 369 |     |     |     |     |     |     |     |     |     |     |     |     |     |     |     |     |     |     |     |     |     |     |     |     |     |     |     |     |     |     |     |     |     |     |     |  |  |
| Asn | 370 |     |     |     |     |     |     |     |     |     |     |     |     |     |     |     |     |     |     |     |     |     |     |     |     |     |     |     |     |     |     |     |     |     |     |     |  |  |

**Table S3:** Contributions to the AABP from each amino acids in RBD from the inter-amino acid interaction.

| AA<br>SeqNo. | NN    | Off-<br>Diag. | Sum   |
|--------------|-------|---------------|-------|--------------|-------|---------------|-------|--------------|-------|---------------|-------|--------------|-------|---------------|-------|
| Leu335       | 0.417 | 0.104         | 0.520 | Ser371       | 0.848 | 0.090         | 0.938 | Val407       | 0.998 | 0.045         | 1.043 | Ser443       | 0.408 | 0.065         | 0.474 |
| Cys336       | 0.923 | 0.254         | 1.177 | Ala372       | 0.828 | -             | 0.828 | Arg408       | 0.946 | 0.056         | 1.002 | Tyr449       | 0.506 | 0.071         | 0.576 |
| Pro337       | 0.958 | 0.039         | 0.997 | Ser373       | 0.815 | 0.037         | 0.851 | Gln409       | 0.854 | 0.082         | 0.936 | Asn450       | 0.923 | -             | 0.923 |
| Phe338       | 0.907 | 0.073         | 0.981 | Phe374       | 0.830 | -             | 0.830 | Ile410       | 0.920 | 0.122         | 1.043 | Tyr451       | 0.836 | 0.058         | 0.894 |
| Gly339       | 0.890 | 0.012         | 0.902 | Ser375       | 0.814 | 0.023         | 0.837 | Ala411       | 0.984 | -             | 0.984 | Leu452       | 0.857 | -             | 0.857 |
| Glu340       | 0.918 | 0.145         | 1.063 | Thr376       | 0.850 | 0.081         | 0.930 | Pro412       | 0.897 | -             | 0.897 | Tyr453       | 0.902 | 0.057         | 0.958 |
| Val341       | 0.901 | 0.025         | 0.926 | Phe377       | 0.876 | -             | 0.876 | Gly413       | 0.818 | -             | 0.818 | Arg454       | 0.462 | 0.039         | 0.502 |
| Phe342       | 0.824 | -             | 0.824 | Lys378       | 0.892 | 0.210         | 1.102 | Gln414       | 0.828 | -             | 0.828 | Pro491       | 0.469 | -             | 0.469 |
| Asn343       | 0.829 | 0.012         | 0.840 | Cys379       | 0.891 | 0.160         | 1.051 | Thr415       | 0.855 | 0.038         | 0.893 | Leu492       | 0.886 | -             | 0.886 |
| Ala344       | 0.845 | 0.030         | 0.874 | Tyr380       | 0.859 | 0.094         | 0.952 | Gly416       | 0.886 | 0.025         | 0.912 | Gln493       | 0.864 | 0.057         | 0.921 |
| Thr345       | 0.863 | 0.033         | 0.896 | Gly381       | 0.841 | -             | 0.841 | Lys417       | 0.885 | 0.029         | 0.914 | Ser494       | 0.864 | 0.071         | 0.935 |
| Arg346       | 0.860 | -             | 0.860 | Val382       | 0.820 | 0.025         | 0.845 | Ile418       | 0.895 | 0.026         | 0.921 | Tyr495       | 0.856 | 0.023         | 0.879 |
| Phe347       | 0.830 | -             | 0.830 | Ser383       | 0.921 | 0.019         | 0.939 | Ala419       | 0.879 | -             | 0.879 | Gly496       | 0.882 | 0.029         | 0.911 |
| Ala348       | 0.834 | -             | 0.834 | Pro384       | 0.929 | -             | 0.929 | Asp420       | 0.835 | 0.010         | 0.845 | Phe497       | 0.866 | 0.023         | 0.889 |
| Ser349       | 0.850 | 0.013         | 0.863 | Thr385       | 0.855 | -             | 0.855 | Tyr421       | 0.822 | 0.016         | 0.838 | Gln498       | 0.880 | 0.029         | 0.908 |
| Val350       | 0.864 | -             | 0.864 | Lys386       | 0.882 | 0.289         | 1.171 | Asn422       | 0.859 | 0.077         | 0.935 | Pro499       | 0.893 | 0.031         | 0.924 |
| Tyr351       | 0.857 | -             | 0.857 | Leu387       | 0.865 | -             | 0.865 | Tyr423       | 0.863 | 0.045         | 0.908 | Thr500       | 0.437 | 0.407         | 0.845 |
| Ala352       | 0.839 | 0.013         | 0.852 | Asn388       | 0.842 | -             | 0.842 | Lys424       | 0.832 | -             | 0.832 | Val503       | 0.939 | 0.109         | 1.048 |
| Trp353       | 0.823 | 0.025         | 0.848 | Asp389       | 0.841 | 0.270         | 1.111 | Leu425       | 0.876 | -             | 0.876 | Gly504       | 1.442 | 0.070         | 1.513 |
| Asn354       | 0.860 | 0.028         | 0.887 | Leu390       | 0.823 | -             | 0.823 | Pro426       | 0.906 | 0.027         | 0.933 | Tyr505       | 0.998 | 0.407         | 1.406 |
| Arg355       | 0.875 | 0.019         | 0.893 | Cys391       | 0.817 | -             | 0.817 | Asp427       | 0.853 | -             | 0.853 | Gln506       | 1.005 | 0.077         | 1.083 |
| Lys356       | 0.860 | 0.160         | 1.020 | Phe392       | 0.828 | -             | 0.828 | Asp428       | 0.821 | 0.027         | 0.848 | Pro507       | 0.961 | 0.039         | 0.999 |
| Arg357       | 0.862 | -             | 0.862 | Thr393       | 0.834 | 0.056         | 0.889 | Phe429       | 0.930 | -             | 0.930 | Tyr508       | 0.889 | 0.152         | 1.041 |
| Ile358       | 0.881 | 0.056         | 0.937 | Asn394       | 0.873 | 0.079         | 0.952 | Thr430       | 0.975 | -             | 0.975 | Arg509       | 0.890 | 0.246         | 1.136 |
| Ser359       | 0.889 | 0.055         | 0.944 | Val395       | 0.913 | 0.056         | 0.969 | Gly431       | 0.910 | 0.046         | 0.955 | Val510       | 0.897 | 0.038         | 0.935 |
| Asn360       | 0.853 | -             | 0.853 | Tyr396       | 0.911 | 0.041         | 0.951 | Cys432       | 0.912 | 0.188         | 1.100 | Val511       | 0.899 | 0.066         | 0.964 |
| Cys361       | 0.872 | 0.173         | 1.045 | Ala397       | 0.917 | 0.054         | 0.971 | Val433       | 0.897 | 0.043         | 0.940 | Val512       | 0.914 | 0.072         | 0.986 |
| Val362       | 0.896 | 0.136         | 1.032 | Asp398       | 0.933 | 0.072         | 1.005 | Ile434       | 0.911 | 0.066         | 0.977 | Leu513       | 0.913 | 0.050         | 0.963 |
| Ala363       | 1.002 | 0.047         | 1.050 | Ser399       | 0.921 | 0.028         | 0.949 | Ala435       | 0.952 | 0.073         | 1.025 | Ser514       | 0.913 | 0.041         | 0.953 |
| Asp364       | 0.998 | 0.025         | 1.023 | Phe400       | 0.905 | 0.038         | 0.943 | Trp436       | 0.948 | 0.057         | 1.005 | Phe515       | 0.882 | -             | 0.882 |
| Tyr365       | 0.886 | 0.061         | 0.947 | Val401       | 0.876 | -             | 0.876 | Asn437       | 0.868 | 0.082         | 0.951 | Glu516       | 0.854 | 0.037         | 0.891 |
| Ser366       | 0.916 | 0.029         | 0.945 | Ile402       | 0.878 | 0.044         | 0.921 | Ser438       | 0.871 | 0.084         | 0.954 | Leu517       | 0.830 | -             | 0.830 |
| Val367       | 0.922 | 0.079         | 1.001 | Arg403       | 0.914 | 0.029         | 0.943 | Asn439       | 0.939 | 0.130         | 1.069 | Leu518       | 0.804 | -             | 0.804 |
| Leu368       | 0.885 | 0.014         | 0.899 | Gly404       | 0.938 | 0.073         | 1.011 | Asn440       | 0.894 | -             | 0.894 | His519       | 0.835 | -             | 0.835 |
| Tyr369       | 0.844 | -             | 0.844 | Asp405       | 0.918 | 0.096         | 1.014 | Leu441       | 0.825 | 0.018         | 0.843 | Ala520       | 0.948 | 0.043         | 0.991 |
| Asn370       | 0.822 | 0.029         | 0.851 | Glu406       | 0.909 | 0.059         | 0.968 | Asp442       | 0.812 | 0.212         | 1.024 | Pro521       | 0.520 | -             | 0.520 |

**Table S4:** Interaction among AA with BL, BO and AABP.

| Bonds | BLs   | BOs    | AA 1   | AA 2   | AABP   | Bonds | BLs   | BOs    | AA 1   | AA 2   | AABP   |
|-------|-------|--------|--------|--------|--------|-------|-------|--------|--------|--------|--------|
| N-C   | 1.361 | 0.4166 | Cys336 | Leu335 | 0.4166 | O...H | 2.016 | 0.0203 | Ile358 | Val395 | 0.0560 |
| N...H | 1.751 | 0.1037 | Leu335 | Val362 | 0.1037 | O...H | 1.848 | 0.0357 | Val395 | Ile358 |        |
| N-C   | 1.363 | 0.5068 | Pro337 | Cys336 | 0.5068 | N-C   | 1.358 | 0.4275 | Asn360 | Ser359 | 0.4275 |
| O...H | 1.780 | 0.0484 | Cys336 | Phe338 | 0.0484 | O...H | 1.800 | 0.0550 | Asn394 | Ser359 | 0.0550 |
| S-S   | 2.025 | 0.1725 | Cys336 | Cys361 | 0.1725 | N-C   | 1.352 | 0.4254 | Cys361 | Asn360 | 0.4254 |
| O...H | 1.864 | 0.0327 | Val362 | Cys336 | 0.0327 | N-C   | 1.347 | 0.4467 | Val362 | Cys361 | 0.4467 |
| N-C   | 1.356 | 0.4511 | Phe338 | Pro337 | 0.4511 | N-C   | 1.357 | 0.4489 | Ala363 | Val362 | 0.4489 |
| O...H | 1.863 | 0.0387 | Pro337 | Glu340 | 0.0387 | N-C   | 1.324 | 0.5533 | Asp364 | Ala363 | 0.5533 |
| N-C   | 1.347 | 0.4563 | Gly339 | Phe338 | 0.4563 | O...H | 1.791 | 0.0474 | Ala363 | Tyr365 | 0.0474 |
| O...H | 1.971 | 0.0250 | Phe338 | Val341 | 0.0250 | N-C   | 1.365 | 0.4449 | Tyr365 | Asp364 | 0.4449 |
| N-C   | 1.360 | 0.4339 | Glu340 | Gly339 | 0.4339 | O...H | 2.017 | 0.0252 | Asp364 | Val367 | 0.0252 |
| O...H | 2.230 | 0.0116 | Gly339 | Asn343 | 0.0116 | N-C   | 1.351 | 0.4410 | Ser366 | Tyr365 | 0.4410 |
| N-C   | 1.337 | 0.4845 | Val341 | Glu340 | 0.4845 | O...H | 2.219 | 0.0137 | Tyr365 | Leu368 | 0.0137 |
| O...H | 1.594 | 0.1062 | Glu340 | Lys356 | 0.1062 | N-C   | 1.346 | 0.4753 | Val367 | Ser366 | 0.4753 |
| N-C   | 1.359 | 0.4168 | Phe342 | Val341 | 0.4168 | O...H | 1.871 | 0.0289 | Ser366 | Asn370 | 0.0289 |
| N-C   | 1.363 | 0.4071 | Asn343 | Phe342 | 0.4071 | N-C   | 1.356 | 0.4469 | Leu368 | Val367 | 0.4469 |
| N-C   | 1.358 | 0.4215 | Ala344 | Asn343 | 0.4215 | O...H | 1.787 | 0.0533 | Val367 | Ser371 | 0.0533 |
| N-C   | 1.364 | 0.4231 | Thr345 | Ala344 | 0.4231 | N-C   | 1.359 | 0.4383 | Tyr369 | Leu368 | 0.4383 |
| O...H | 1.975 | 0.0297 | Ala344 | Arg509 | 0.0297 | N-C   | 1.368 | 0.4052 | Asn370 | Tyr369 | 0.4052 |
| N-C   | 1.358 | 0.4397 | Arg346 | Thr345 | 0.4397 | N-C   | 1.359 | 0.4171 | Ser371 | Asn370 | 0.4171 |
| O...H | 1.921 | 0.0328 | Thr345 | Arg509 | 0.0328 | N-C   | 1.361 | 0.4308 | Ala372 | Ser371 | 0.4308 |
| N-C   | 1.354 | 0.4205 | Phe347 | Arg346 | 0.4205 | O...H | 1.906 | 0.0237 | Ser371 | Ser373 | 0.0366 |
| N-C   | 1.366 | 0.4093 | Ala348 | Phe347 | 0.4093 | O...H | 2.148 | 0.0129 | Ser371 | Ser373 |        |
| N-C   | 1.355 | 0.4247 | Ser349 | Ala348 | 0.4247 | N-C   | 1.368 | 0.3972 | Ser373 | Ala372 | 0.3972 |
| N-C   | 1.357 | 0.4254 | Val350 | Ser349 | 0.4254 | N-C   | 1.363 | 0.4174 | Phe374 | Ser373 | 0.4174 |
| O...H | 2.191 | 0.0126 | Ser349 | Ala352 | 0.0126 | N-C   | 1.372 | 0.4126 | Ser375 | Phe374 | 0.4126 |
| N-C   | 1.355 | 0.4381 | Tyr351 | Val350 | 0.4381 | N-C   | 1.380 | 0.4013 | Thr376 | Ser375 | 0.4013 |
| N-C   | 1.360 | 0.4186 | Ala352 | Tyr351 | 0.4186 | O...H | 1.999 | 0.0228 | Ala435 | Ser375 | 0.0228 |
| N-C   | 1.359 | 0.4208 | Trp353 | Ala352 | 0.4208 | N-C   | 1.350 | 0.4485 | Phe377 | Thr376 | 0.4485 |
| N-C   | 1.374 | 0.4025 | Asn354 | Trp353 | 0.4025 | O...H | 1.841 | 0.0303 | Thr376 | Arg408 | 0.0303 |
| O...H | 1.950 | 0.0248 | Asn422 | Trp353 | 0.0248 | O...H | 1.959 | 0.0276 | Thr376 | Ala435 | 0.0503 |
| N-C   | 1.349 | 0.4572 | Arg355 | Asn354 | 0.4572 | O...H | 1.967 | 0.0227 | Ala435 | Thr376 |        |
| O...H | 1.962 | 0.0276 | Asn354 | Ser399 | 0.0276 | N-C   | 1.355 | 0.4278 | Lys378 | Phe377 | 0.4278 |
| N-C   | 1.359 | 0.4176 | Lys356 | Arg355 | 0.4176 | N-C   | 1.351 | 0.4638 | Cys379 | Lys378 | 0.4638 |
| O...H | 1.957 | 0.0185 | Tyr423 | Arg355 | 0.0185 | O...H | 1.847 | 0.0449 | Tyr380 | Lys378 | 0.0449 |
| N-C   | 1.355 | 0.4420 | Arg357 | Lys356 | 0.4420 | O...H | 1.567 | 0.1221 | Ile410 | Lys378 | 0.1221 |
| O...H | 1.991 | 0.0238 | Lys356 | Ala397 | 0.0538 | O...H | 1.878 | 0.0294 | Lys378 | Val433 | 0.0430 |
| O...H | 1.901 | 0.0300 | Ala397 | Lys356 |        | O...H | 2.148 | 0.0136 | Val433 | Lys378 |        |
| N-C   | 1.346 | 0.4201 | Ile358 | Arg357 | 0.4201 | N-C   | 1.354 | 0.4276 | Tyr380 | Cys379 | 0.4276 |
| N-C   | 1.345 | 0.4613 | Ser359 | Ile358 | 0.4613 | S-S   | 2.037 | 0.1599 | Cys379 | Cys432 | 0.1599 |

| Bonds | BLs   | BOs    | AA 1   | AA 2   | AABP   | Bonds | BLs   | BOs    | AA 1   | AA 2   | AABP   |
|-------|-------|--------|--------|--------|--------|-------|-------|--------|--------|--------|--------|
| N-C   | 1.358 | 0.4312 | Gly381 | Tyr380 | 0.4312 | O...H | 1.773 | 0.0449 | Gly404 | Val407 | 0.0449 |
| O...H | 2.003 | 0.0248 | Tyr380 | Val382 | 0.0248 | O...H | 1.936 | 0.0283 | Gln506 | Gly404 | 0.0283 |
| O...H | 1.951 | 0.0239 | Gly431 | Tyr380 | 0.0239 | N-C   | 1.355 | 0.4386 | Glu406 | Asp405 | 0.4386 |
| N-C   | 1.359 | 0.4097 | Val382 | Gly381 | 0.4097 | O...H | 2.046 | 0.0252 | Asp405 | Arg408 | 0.0252 |
| N-C   | 1.359 | 0.4107 | Ser383 | Val382 | 0.4107 | O...H | 1.664 | 0.0704 | Gly504 | Asp405 | 0.0704 |
| N-C   | 1.354 | 0.5098 | Pro384 | Ser383 | 0.5098 | N-C   | 1.345 | 0.4705 | Val407 | Glu406 | 0.4705 |
| O...H | 2.100 | 0.0187 | Ser383 | Lys386 | 0.0187 | O...H | 1.896 | 0.0297 | Glu406 | Gln409 | 0.0297 |
| N-C   | 1.358 | 0.4188 | Thr385 | Pro384 | 0.4188 | O...H | 1.870 | 0.0390 | Val407 | Arg408 | 0.5279 |
| N-C   | 1.357 | 0.4358 | Lys386 | Thr385 | 0.4358 | O...H | 2.060 | 0.0217 | Val407 | Arg408 |        |
| N-C   | 1.359 | 0.4459 | Leu387 | Lys386 | 0.4459 | N-C   | 1.348 | 0.4672 | Arg408 | Val407 |        |
| O...H | 2.141 | 0.0149 | Lys386 | Asp389 | 0.2704 | N-C   | 1.365 | 0.4183 | Gln409 | Arg408 | 0.4183 |
| O-H   | 1.030 | 0.2555 | Asp389 | Lys386 |        | N-C   | 1.363 | 0.4354 | Ile410 | Gln409 | 0.4354 |
| N-C   | 1.359 | 0.4188 | Asn388 | Leu387 | 0.4188 | O...H | 1.875 | 0.0375 | Thr415 | Gln409 | 0.0375 |
| N-C   | 1.363 | 0.4236 | Asp389 | Asn388 | 0.4236 | O...H | 2.196 | 0.0151 | Gln409 | Gly416 | 0.0151 |
| N-C   | 1.361 | 0.4172 | Leu390 | Asp389 | 0.4172 | N-C   | 1.337 | 0.4850 | Ala411 | Ile410 | 0.4850 |
| N-C   | 1.370 | 0.4060 | Cys391 | Leu390 | 0.4060 | N-C   | 1.347 | 0.4985 | Pro412 | Ala411 | 0.4985 |
| N-C   | 1.359 | 0.4110 | Phe392 | Cys391 | 0.4110 | N-C   | 1.362 | 0.3986 | Gly413 | Pro412 | 0.3986 |
| N-C   | 1.359 | 0.4169 | Thr393 | Phe392 | 0.4169 | N-C   | 1.357 | 0.4198 | Gln414 | Gly413 | 0.4198 |
| N-C   | 1.370 | 0.4167 | Asn394 | Thr393 | 0.4167 | N-C   | 1.365 | 0.4077 | Thr415 | Gln414 | 0.4077 |
| O...H | 2.148 | 0.0133 | Glu516 | Thr393 | 0.0133 | N-C   | 1.352 | 0.4474 | Gly416 | Thr415 | 0.4474 |
| O...H | 1.835 | 0.0425 | Ala520 | Thr393 | 0.0425 | N-C   | 1.358 | 0.4390 | Lys417 | Gly416 | 0.4390 |
| N-C   | 1.345 | 0.4562 | Val395 | Asn394 | 0.4562 | O...H | 2.257 | 0.0102 | Gly416 | Asp420 | 0.0102 |
| O...H | 1.947 | 0.0238 | Asn394 | Glu516 | 0.0238 | N-C   | 1.353 | 0.4462 | Ile418 | Lys417 | 0.4462 |
| N-C   | 1.355 | 0.4565 | Tyr396 | Val395 | 0.4565 | O...H | 2.095 | 0.0161 | Lys417 | Tyr421 | 0.0161 |
| N-C   | 1.348 | 0.4541 | Ala397 | Tyr396 | 0.4541 | O...H | 2.251 | 0.0124 | Lys417 | Asn422 | 0.0124 |
| O...H | 1.926 | 0.0279 | Tyr396 | Ser514 | 0.0406 | N-C   | 1.352 | 0.4489 | Ala419 | Ile418 | 0.4489 |
| O...H | 2.139 | 0.0127 | Ser514 | Tyr396 |        | O...H | 1.909 | 0.0263 | Ile418 | Tyr423 | 0.0263 |
| N-C   | 1.344 | 0.4627 | Asp398 | Ala397 | 0.4627 | N-C   | 1.360 | 0.4299 | Asp420 | Ala419 | 0.4299 |
| N-C   | 1.345 | 0.4706 | Ser399 | Asp398 | 0.4706 | N-C   | 1.370 | 0.4046 | Tyr421 | Asp420 | 0.4046 |
| O...H | 1.824 | 0.0389 | Asp398 | Val512 | 0.0720 | N-C   | 1.369 | 0.4174 | Asn422 | Tyr421 | 0.4174 |
| O...H | 1.902 | 0.0331 | Val512 | Asp398 |        | N-C   | 1.361 | 0.4412 | Tyr423 | Asn422 | 0.4412 |
| N-C   | 1.347 | 0.4504 | Phe400 | Ser399 | 0.4504 | O...H | 1.943 | 0.0393 | Asn422 | Arg454 | 0.0393 |
| N-C   | 1.350 | 0.4544 | Val401 | Phe400 | 0.4544 | N-C   | 1.356 | 0.4217 | Lys424 | Tyr423 | 0.4217 |
| O...H | 1.940 | 0.0241 | Phe400 | Val510 | 0.0381 | N-C   | 1.363 | 0.4103 | Leu425 | Lys424 | 0.4103 |
| O...H | 2.192 | 0.0140 | Val510 | Phe400 |        | N-C   | 1.361 | 0.4656 | Pro426 | Leu425 | 0.4656 |
| N-C   | 1.358 | 0.4220 | Ile402 | Val401 | 0.4220 | N-C   | 1.357 | 0.4404 | Asp427 | Pro426 | 0.4404 |
| N-C   | 1.354 | 0.4556 | Arg403 | Ile402 | 0.4556 | O...H | 1.957 | 0.0273 | Pro426 | Asp428 | 0.0273 |
| O...H | 1.884 | 0.0295 | Ile402 | Tyr508 | 0.0435 | N-C   | 1.360 | 0.4127 | Asp428 | Asp427 | 0.4127 |
| O...H | 2.196 | 0.0140 | Tyr508 | Ile402 |        | N-C   | 1.367 | 0.4079 | Phe429 | Asp428 | 0.4079 |
| N-C   | 1.343 | 0.4584 | Gly404 | Arg403 | 0.4584 | O...H | 1.787 | 0.0596 | Phe429 | Thr430 | 0.5220 |
| O...H | 1.953 | 0.0289 | Arg403 | Glu406 | 0.0289 | N-C   | 1.343 | 0.4624 | Thr430 | Phe429 | 0.5220 |
| N-C   | 1.344 | 0.4798 | Asp405 | Gly404 | 0.4798 | N-C   | 1.350 | 0.4525 | Gly431 | Thr430 |        |

| Bonds | BLs   | BOs    | AA 1   | AA 2   | AABP   | Bonds | BLs   | BOs    | AA 1   | AA 2   | AABP   |
|-------|-------|--------|--------|--------|--------|-------|-------|--------|--------|--------|--------|
| N-C   | 1.354 | 0.4572 | Cys432 | Gly431 | 0.4572 | O...H | 1.872 | 0.0303 | Tyr453 | Gln493 | 0.0568 |
| O...H | 2.054 | 0.0217 | Leu513 | Gly431 | 0.0217 | O...H | 1.940 | 0.0265 | Gln493 | Tyr453 |        |
| N-C   | 1.346 | 0.4543 | Val433 | Cys432 | 0.4543 | N...H | 2.144 | 0.0394 | Pro491 | Leu492 | 0.4692 |
| O...H | 1.918 | 0.0282 | Cys432 | Leu513 | 0.0282 | N-C   | 1.345 | 0.4298 | Leu492 | Pro491 |        |
| N-C   | 1.343 | 0.4426 | Ile434 | Val433 | 0.4426 | N-C   | 1.358 | 0.4163 | Gln493 | Leu492 | 0.4163 |
| N-C   | 1.349 | 0.4688 | Ala435 | Ile434 | 0.4688 | N-C   | 1.354 | 0.4474 | Ser494 | Gln493 | 0.4474 |
| O...H | 1.853 | 0.0347 | Ile434 | Val511 | 0.0655 | N-C   | 1.358 | 0.4170 | Tyr495 | Ser494 | 0.4170 |
| O...H | 1.921 | 0.0308 | Val511 | Ile434 |        | N-C   | 1.357 | 0.4392 | Gly496 | Tyr495 | 0.4392 |
| N-C   | 1.343 | 0.4831 | Trp436 | Ala435 | 0.4831 | O...H | 2.037 | 0.0225 | Tyr495 | Phe497 | 0.0225 |
| N-C   | 1.348 | 0.4644 | Asn437 | Trp436 | 0.4644 | N-C   | 1.355 | 0.4428 | Phe497 | Gly496 | 0.4428 |
| O...H | 2.278 | 0.0119 | Trp436 | Ser438 | 0.0119 | O...H | 1.982 | 0.0286 | Gly496 | Gln498 | 0.0286 |
| O...H | 1.988 | 0.0238 | Trp436 | Arg509 | 0.0452 | N-C   | 1.353 | 0.4236 | Gln498 | Phe497 | 0.4236 |
| O...H | 2.059 | 0.0214 | Arg509 | Trp436 |        | N-C   | 1.372 | 0.4562 | Pro499 | Gln498 | 0.4562 |
| N-C   | 1.353 | 0.4039 | Ser438 | Asn437 | 0.4039 | N-C   | 1.354 | 0.4372 | Thr500 | Pro499 | 0.4372 |
| O...H | 1.889 | 0.0331 | Asn437 | Asn439 | 0.0331 | C-H   | 1.118 | 0.4074 | Thr500 | Tyr505 | 0.4074 |
| O...H | 1.780 | 0.0491 | Gln506 | Asn437 | 0.0491 | N-H   | 1.024 | 0.3395 | Val503 | Gly504 | 0.9390 |
| N-C   | 1.352 | 0.4670 | Asn439 | Ser438 | 0.4670 | N-C   | 1.316 | 0.5995 | Gly504 | Val503 |        |
| O...H | 2.044 | 0.0177 | Ser438 | Leu441 | 0.0177 | O...H | 1.505 | 0.1089 | Val503 | Tyr508 | 0.1089 |
| O...H | 2.071 | 0.0154 | Ser438 | Asp442 | 0.0154 | N...H | 2.042 | 0.0367 | Gly504 | Tyr505 | 0.5032 |
| O...H | 1.841 | 0.0385 | Pro507 | Ser438 | 0.0385 | N-C   | 1.344 | 0.4665 | Tyr505 | Gly504 |        |
| O...H | 2.030 | 0.0235 | Asn439 | Asn440 | 0.4721 | O...H | 1.704 | 0.0688 | Tyr505 | Gln506 | 0.4952 |
| N-C   | 1.342 | 0.4486 | Asn440 | Asn439 |        | N-C   | 1.355 | 0.4264 | Gln506 | Tyr505 |        |
| O...H | 1.768 | 0.0654 | Asn439 | Ser443 | 0.0654 | N-C   | 1.355 | 0.5101 | Pro507 | Gln506 | 0.5101 |
| O...H | 1.967 | 0.0310 | Pro499 | Asn439 | 0.0310 | N-C   | 1.351 | 0.4505 | Tyr508 | Pro507 | 0.4505 |
| N-C   | 1.360 | 0.4221 | Leu441 | Asn440 | 0.4221 | N-C   | 1.353 | 0.4384 | Arg509 | Tyr508 | 0.4384 |
| N-C   | 1.373 | 0.4032 | Asp442 | Leu441 | 0.4032 | N-C   | 1.352 | 0.4513 | Val510 | Arg509 | 0.4513 |
| N-C   | 1.371 | 0.4084 | Ser443 | Asp442 | 0.4084 | N-C   | 1.354 | 0.4460 | Val511 | Val510 | 0.4460 |
| O...H | 1.686 | 0.0580 | Asp442 | Tyr451 | 0.0580 | N-C   | 1.353 | 0.4526 | Val512 | Val511 | 0.4526 |
| O...H | 1.652 | 0.0836 | Asp442 | Arg509 | 0.1386 | N-C   | 1.353 | 0.4617 | Leu513 | Val512 | 0.4617 |
| O...H | 1.769 | 0.0550 | Asp442 | Arg509 |        | N-C   | 1.355 | 0.4513 | Ser514 | Leu513 | 0.4513 |
| N...H | 1.954 | 0.0499 | Tyr449 | Asn450 | 0.5055 | N-C   | 1.342 | 0.4614 | Phe515 | Ser514 | 0.4614 |
| N-C   | 1.348 | 0.4556 | Asn450 | Tyr449 |        | N-C   | 1.357 | 0.4205 | Glu516 | Phe515 | 0.4205 |
| O...H | 1.736 | 0.0705 | Tyr449 | Ser494 | 0.0705 | N-C   | 1.351 | 0.4333 | Leu517 | Glu516 | 0.4333 |
| N-C   | 1.354 | 0.4178 | Tyr451 | Asn450 | 0.4178 | N-C   | 1.362 | 0.3970 | Leu518 | Leu517 | 0.3970 |
| N-C   | 1.358 | 0.4180 | Leu452 | Tyr451 | 0.4180 | N-C   | 1.365 | 0.4069 | His519 | Leu518 | 0.4069 |
| N-C   | 1.353 | 0.4393 | Tyr453 | Leu452 | 0.4393 | N-C   | 1.353 | 0.4284 | Ala520 | His519 | 0.4284 |
| N-C   | 1.355 | 0.4622 | Arg454 | Tyr453 | 0.4622 | N-C   | 1.349 | 0.5197 | Pro521 | Ala520 | 0.5197 |



**Table S5:** AA with chain of *off-diagonal connections* from 9 to 3 AA.

| Unique <i>off-diagonal connections</i> |        |        |        |        |        |        |        |        | Count |
|----------------------------------------|--------|--------|--------|--------|--------|--------|--------|--------|-------|
| Ala344                                 | Arg509 | Asp442 | Leu441 | Pro507 | Ser438 | Thr345 | Trp436 | Tyr451 | 9     |
| Cys379                                 | Cys432 | Gly431 | Ile410 | Leu513 | Lys378 | Tyr380 | Val382 | Val433 | 9     |
| Asn437                                 | Asn439 | Gln506 | Gly404 | Pro499 | Ser443 | Val407 |        |        | 7     |
| Cys336                                 | Cys361 | Leu335 | Phe338 | Val341 | Val362 |        |        |        | 6     |
| Ala435                                 | Arg408 | Asp405 | Gly504 | Ser375 | Thr376 |        |        |        | 6     |
| Arg403                                 | Asp420 | Gln409 | Glu406 | Gly416 | Thr415 |        |        |        | 6     |
| Arg454                                 | Asn422 | Lys417 | Trp353 | Tyr421 |        |        |        |        | 5     |
| Ala520                                 | Asn394 | Glu516 | Ser359 | Thr393 |        |        |        |        | 5     |
| Ala397                                 | Glu340 | Lys356 | Pro337 |        |        |        |        |        | 4     |
| Asp364                                 | Ser371 | Ser373 | Val367 |        |        |        |        |        | 4     |
| Arg355                                 | Ile418 | Tyr423 |        |        |        |        |        |        | 3     |
| Ala363                                 | Leu368 | Tyr365 |        |        |        |        |        |        | 3     |
| Asp389                                 | Lys386 | Ser383 |        |        |        |        |        |        | 3     |
| Ile402                                 | Tyr508 | Val503 |        |        |        |        |        |        | 3     |
